# Supplementary material
Source: PubMed Central journal article supplement (PMC8536328)
Supplement: pnas.2105972118.sapp.pdf [file pnas.2105972118.sapp.pdf]

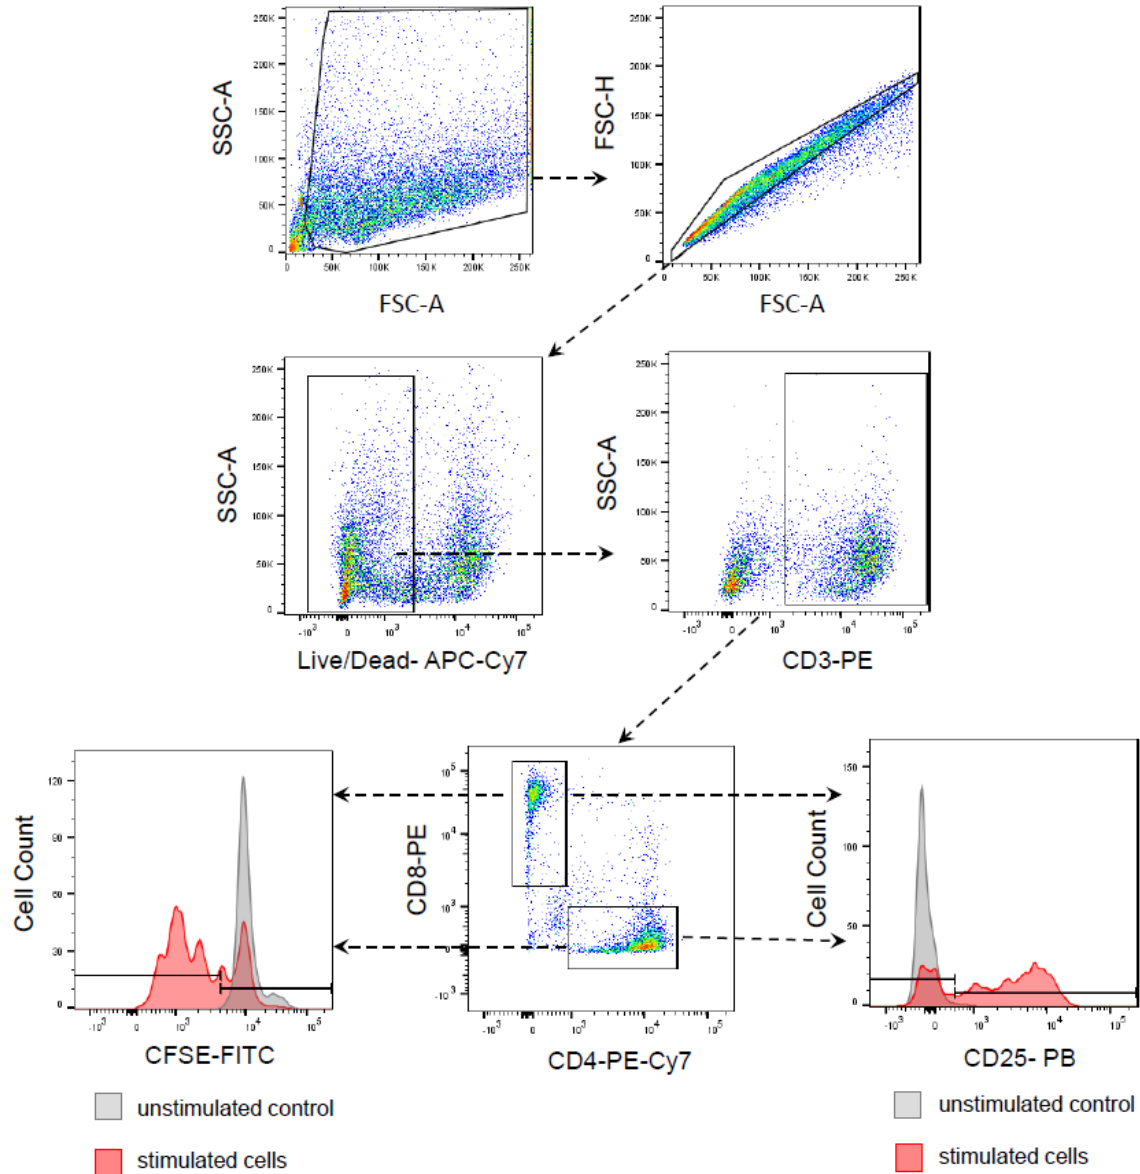

**Fig. S1. Representative FACS gating strategy for quantifying functional immunosuppression.** Cells were first gated on a SSC-A vs. FSC-A plot to exclude debris. Single cells were then gated based on a FSC-H vs. FSC-A plot. Live cells were then gated using fixable live/dead stain. The percentage of each T-cell subset was then determined based on CD3, CD4, and CD8 staining. The percentage of proliferating T-cells was determined based on CFSE staining and the percentage of activated T-cells was determined based on CD25 staining with respect to unstimulated cells.

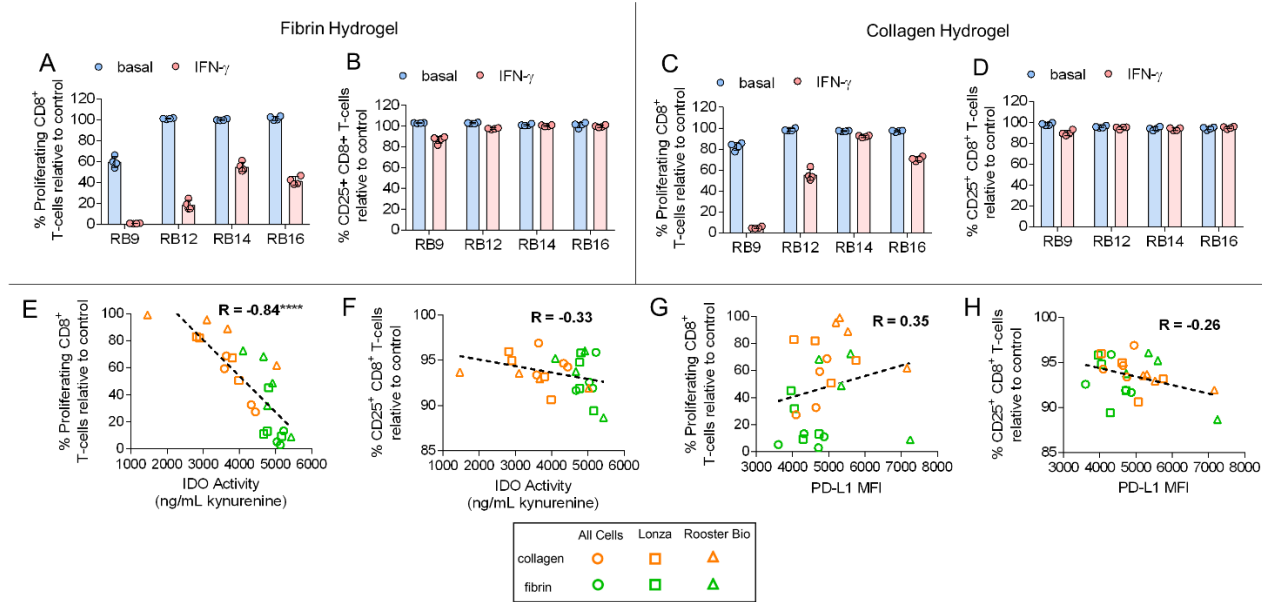

**Fig. S2. Functional immunosuppressive capacity of IFN- $\gamma$  licensed MSCs on biomaterial hydrogels.** (A and B) (A) The percent proliferating and (B) percent CD25<sup>+</sup> CD8<sup>+</sup> T-cells in the presence of MSC lines, with and without IFN- $\gamma$  licensing, cultured on fibrin. (C and D) (C) The percent proliferating and (D) percent CD25<sup>+</sup> CD8<sup>+</sup> T-cells in the presence of MSC lines, with and without IFN- $\gamma$  licensing, cultured on collagen. (E and F) Correlation between IDO activity with (E) proliferating CD8<sup>+</sup> T-cells and (F) CD25<sup>+</sup> CD8<sup>+</sup> T-cells of IFN- $\gamma$  licensed MSC cell lines cultured on fibrin and collagen. (G and H) Correlation between PD-L1 MFI with (G) proliferating CD8<sup>+</sup> T-cells and (H) CD25<sup>+</sup> CD8<sup>+</sup> T-cells of IFN- $\gamma$  licensed MSC cell lines cultured on fibrin and collagen. Data are presented as means  $\pm$  SD. Significance is denoted by \*\*\*\* $P \leq 0.0001$  by two-tailed Spearman's rank correlation.

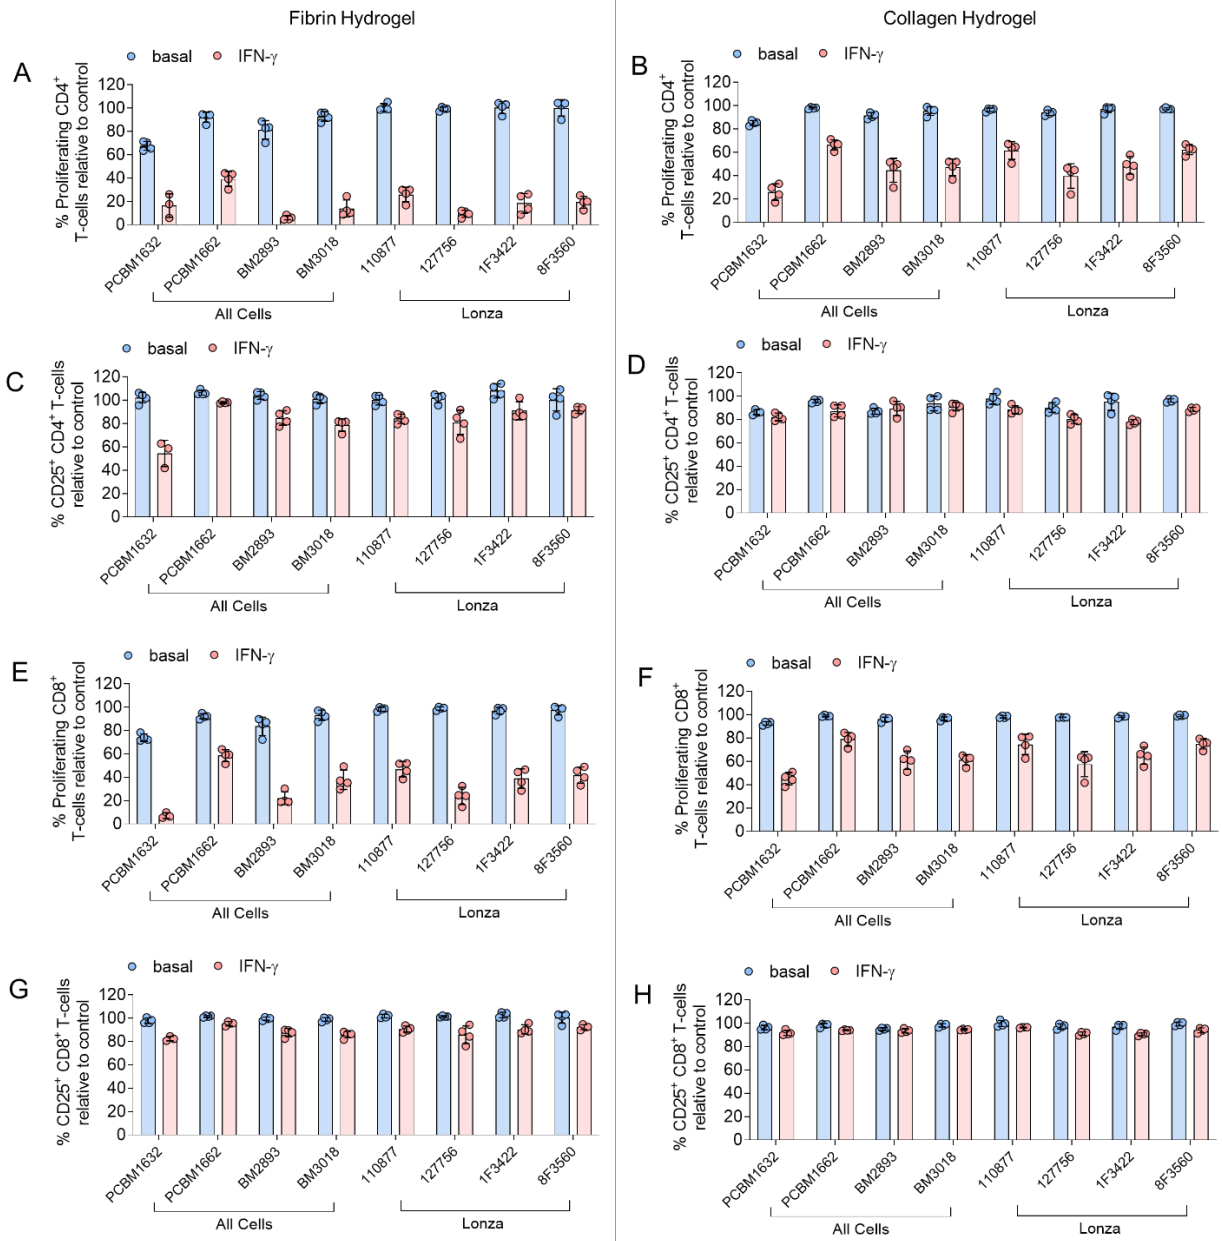

**Fig. S3. Functional immunosuppressive capacity of IFN- $\gamma$  licensed MSCs from All Cells and Lonza on biomaterial hydrogels.** (A and B) The percent proliferating CD4<sup>+</sup> T-cells in the presence of MSC lines, with and without IFN- $\gamma$  licensing, cultured on (A) fibrin and (B) collagen. (C and D) The percent CD25<sup>+</sup> CD4<sup>+</sup> T-cells in the presence of MSC lines, with and without IFN- $\gamma$  licensing, cultured on (C) fibrin and (D) collagen. (E and F) The percent proliferating CD8<sup>+</sup> T-cells in the presence of MSC lines, with and without IFN- $\gamma$  licensing, cultured on (E) fibrin and (F) collagen. (G and H) The percent CD25<sup>+</sup> CD8<sup>+</sup> T-cells in the presence of MSC lines, with and without IFN- $\gamma$  licensing, cultured on (G) fibrin and (H) collagen. Data are presented as means  $\pm$  SD.

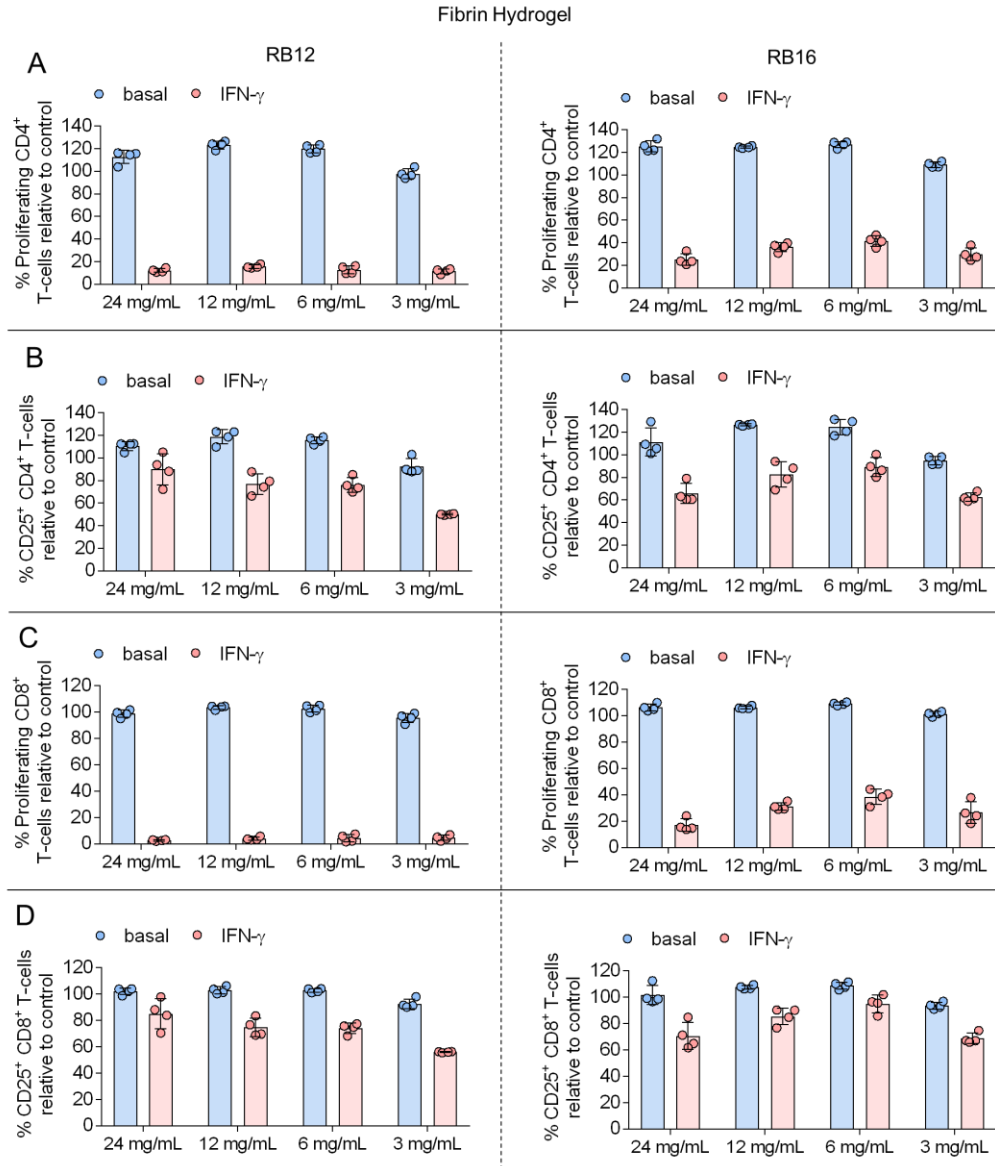

**Fig. S4. Role of fibrinogen concentration on IFN- $\gamma$  licensed MSC immunosuppressive capacity on fibrin hydrogels.** (A and B) (A) The percent proliferating and (B) percent CD25<sup>+</sup> CD4<sup>+</sup> T-cells in the presence of MSC lines, with and without IFN- $\gamma$  licensing, cultured on fibrin hydrogels of varying fibrinogen polymer concentrations. (C and D) (C) The percent proliferating and (D) percent CD25<sup>+</sup> CD8<sup>+</sup> T-cells in the presence of MSC lines, with and without IFN- $\gamma$  licensing, cultured on fibrin hydrogels of varying fibrinogen polymer concentrations. Data are presented as means  $\pm$  SD.

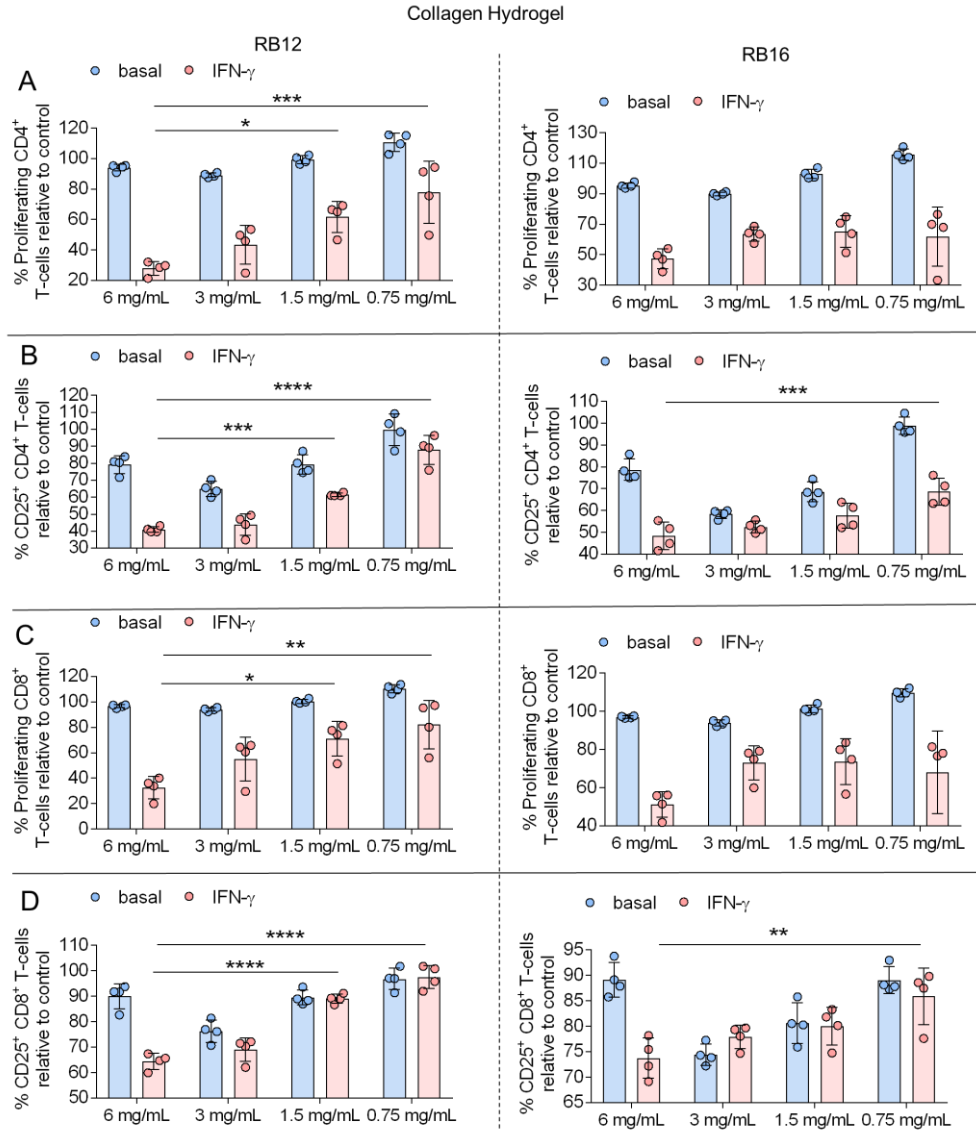

**Fig. S5. Role of collagen I concentration on IFN- $\gamma$  licensed MSC immunosuppressive capacity on collagen hydrogels.** (A and B) (A) The percent proliferating and (B) percent CD25<sup>+</sup> CD4<sup>+</sup> T-cells in the presence of MSC lines, with and without IFN- $\gamma$  licensing, cultured on collagen hydrogels of varying collagen I polymer concentrations. (C and D) (C) The percent proliferating and (D) percent CD25<sup>+</sup> CD8<sup>+</sup> T-cells in the presence of MSC lines, with and without IFN- $\gamma$  licensing, cultured on collagen hydrogels of varying collagen I polymer concentrations. Data are presented as means  $\pm$  SD. Significance is denoted by \* $P \leq 0.05$ , \*\* $P \leq 0.01$ , \*\*\* $P \leq 0.001$ , or \*\*\*\* $P \leq 0.0001$  by one-way analysis of variance (ANOVA) with Tukey's post hoc test.

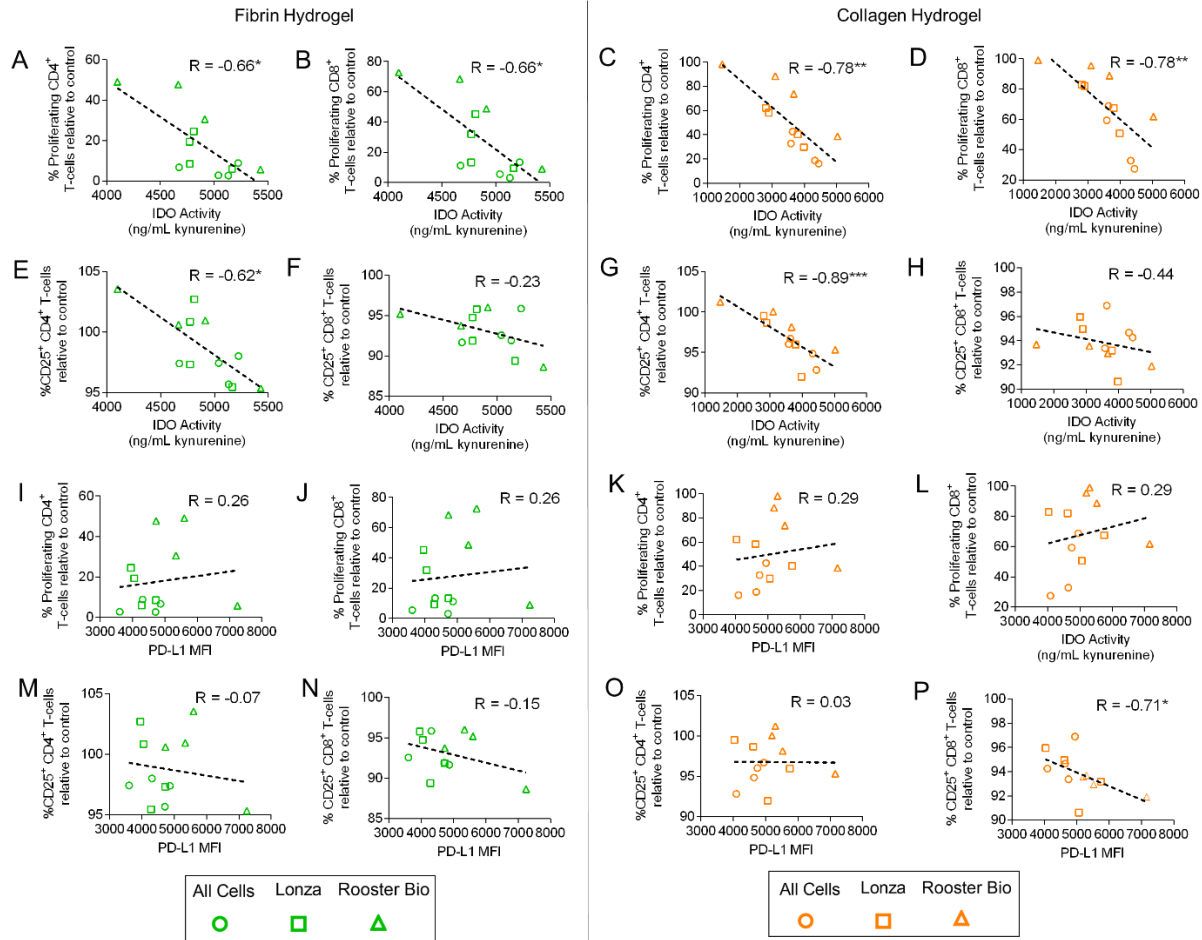

**Fig. S6. IDO activity correlates with functional immunosuppressive capacity of IFN- $\gamma$  licensed MSCs on biomaterials.** (A to D) Correlation of IDO activity with percent proliferating (A) CD4<sup>+</sup> and (B) CD8<sup>+</sup> T-cells of IFN- $\gamma$  licensed MSCs cultured on fibrin, and with percent proliferating (C) CD4<sup>+</sup> and (D) CD8<sup>+</sup> T-cells of IFN- $\gamma$  licensed MSCs cultured on collagen. (E to H) Correlation of IDO activity with percent CD25<sup>+</sup> (E) CD4<sup>+</sup> and (F) CD8<sup>+</sup> T-cells of IFN- $\gamma$  licensed MSCs cultured on fibrin, and with percent CD25<sup>+</sup> (G) CD4<sup>+</sup> and (H) CD8<sup>+</sup> T-cells of IFN- $\gamma$  licensed MSCs cultured on collagen. (I to L) Correlation of mean fluorescence intensity (MFI) of PD-L1 expression with percent proliferating (I) CD4<sup>+</sup> and (J) CD8<sup>+</sup> T-cells of IFN- $\gamma$  licensed MSCs cultured on fibrin, and with percent proliferating (K) CD4<sup>+</sup> and (L) CD8<sup>+</sup> T-cells of IFN- $\gamma$  licensed MSCs cultured on collagen. (M to P) Correlation of mean fluorescence intensity (MFI) of PD-L1 expression with percent CD25<sup>+</sup> (M) CD4<sup>+</sup> and (N) CD8<sup>+</sup> T-cells of IFN- $\gamma$  licensed MSCs cultured on fibrin, and with percent CD25<sup>+</sup> (O) CD4<sup>+</sup> and (P) CD8<sup>+</sup> T-cells of IFN- $\gamma$  licensed MSCs cultured on collagen. Data are presented as means  $\pm$  SD. Significance is denoted by \* $P \leq 0.05$  or \*\* $P \leq 0.01$  by two-tailed Spearman's rank correlation.

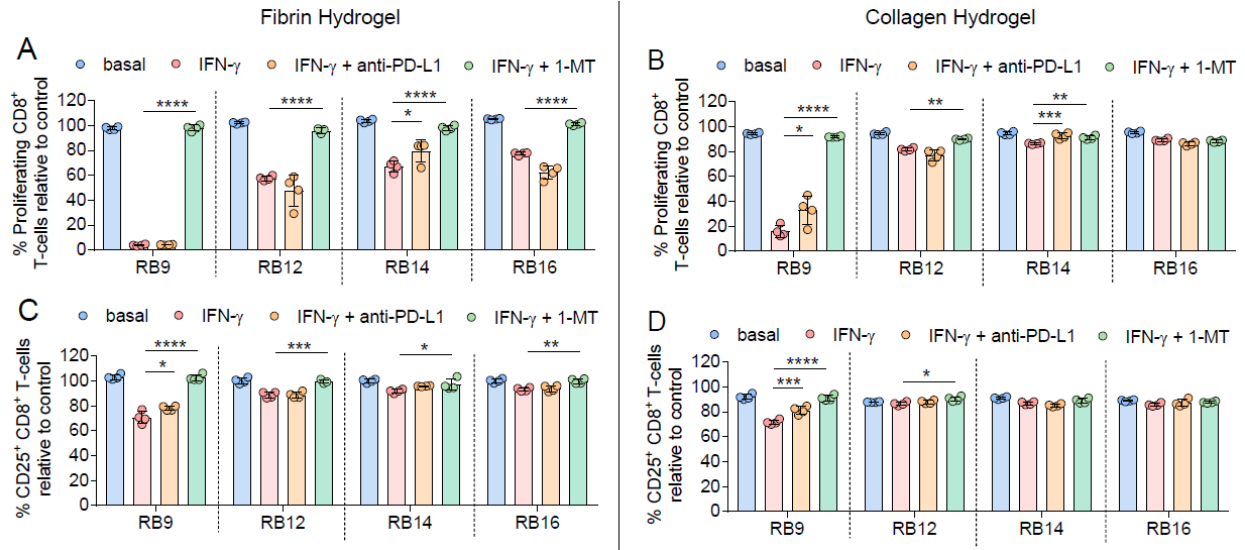

**Fig. S7. IDO activity strongly regulates functional immunosuppressive capacity of IFN- $\gamma$  licensed MSCs on biomaterials.** (A and B) The percent proliferating CD8<sup>+</sup> T-cells in the presence of MSC lines, with and without IFN- $\gamma$  licensing, cultured on (A) fibrin or (B) collagen with and without the addition of anti-PD-L1 antibody or 1-methyl-DL-tryptophan (1-MT), an IDO inhibitor. (C and D) The percent CD25<sup>+</sup> CD8<sup>+</sup> T-cells in the presence of MSC lines, with and without IFN- $\gamma$  licensing, cultured on (C) fibrin or (D) collagen with and without the addition of anti-PD-L1 antibody or 1-MT.  $n = 3-4$  for all data sets. Data are presented as means  $\pm$  SD. Significance is denoted by \* $P \leq 0.05$ , \*\* $P \leq 0.01$ , \*\*\* $P \leq 0.001$ , or \*\*\*\* $P \leq 0.0001$  by one-way analysis of variance (ANOVA) with Tukey's post hoc test; separate comparisons were made between conditions of each cell line.

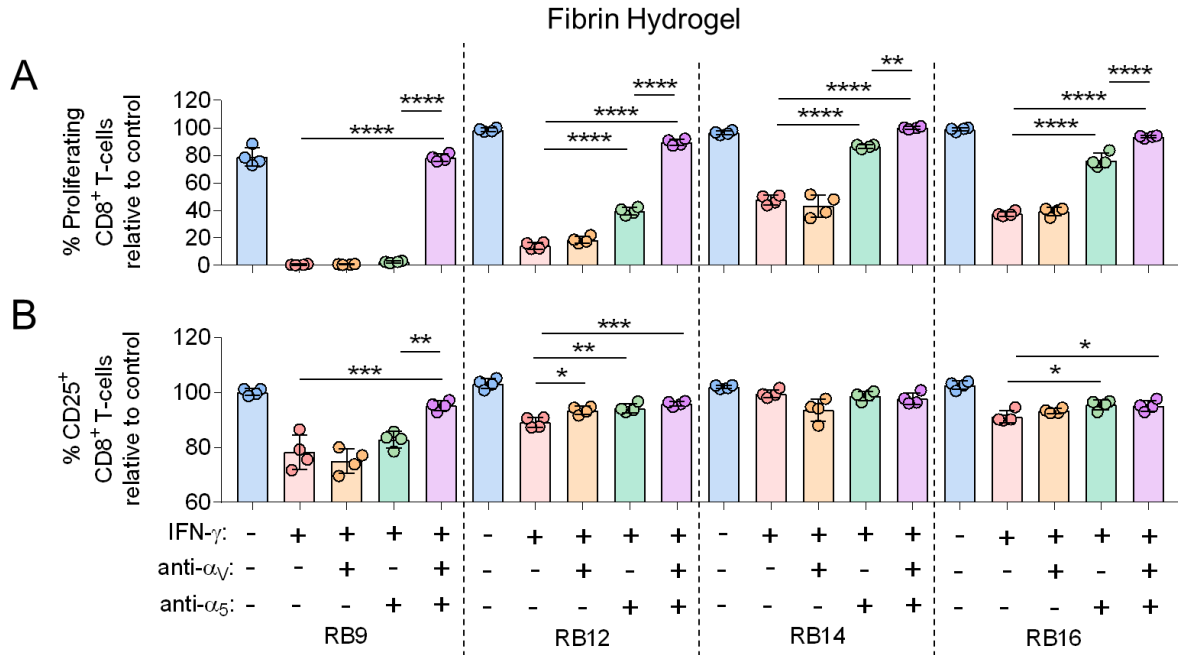

**Fig. S8. Engagement of  $\alpha_v$  and  $\alpha_5$  integrins regulates immunosuppressive capacity of IFN- $\gamma$  licensed MSCs on fibrin.** (A and B) (A) The percent proliferating and (B) CD25<sup>+</sup> CD8<sup>+</sup> T-cells in the presence of various MSCs lines, with and without IFN- $\gamma$  licensing, cultured on fibrin, with and without the addition of inhibitors to  $\alpha_v$  and/or  $\alpha_5$  integrin binding. Labels for groups in (A-B) are shown in (B).  $n = 4$  for all data sets. Data are presented as means  $\pm$  SD. Significance is denoted by \* $P \leq 0.05$ , \*\* $P \leq 0.01$ , \*\*\* $P \leq 0.001$ , or \*\*\*\* $P \leq 0.0001$  by one-way analysis of variance (ANOVA) with Tukey's post hoc test; separate comparisons were made between conditions of each cell line.



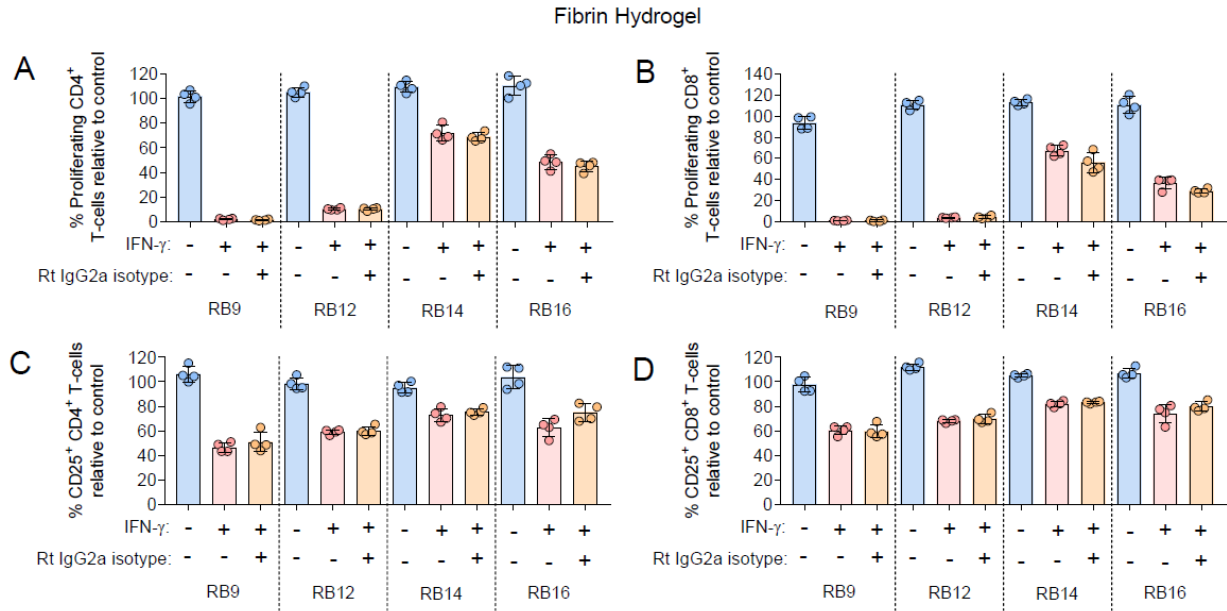

**Fig. S9. Role of RGD integrin isotype antibodies on immunosuppressive capacity of IFN- $\gamma$  licensed MSCs on fibrin.** (A and B) The percent proliferating (A) CD4<sup>+</sup> and (B) CD8<sup>+</sup> T-cells in the presence of MSC lines, cultured on fibrin with and without IFN- $\gamma$  stimulation and the addition of a rat IgG2a isotype control antibody. (C and D) The percent CD25<sup>+</sup> (C) CD4<sup>+</sup> and (D) CD8<sup>+</sup> T-cells in the presence of MSC lines, cultured on fibrin with and without IFN- $\gamma$  stimulation and the addition of a rat IgG2a isotype control antibody. Data are presented as means  $\pm$  SD.

## Fibrin Hydrogel

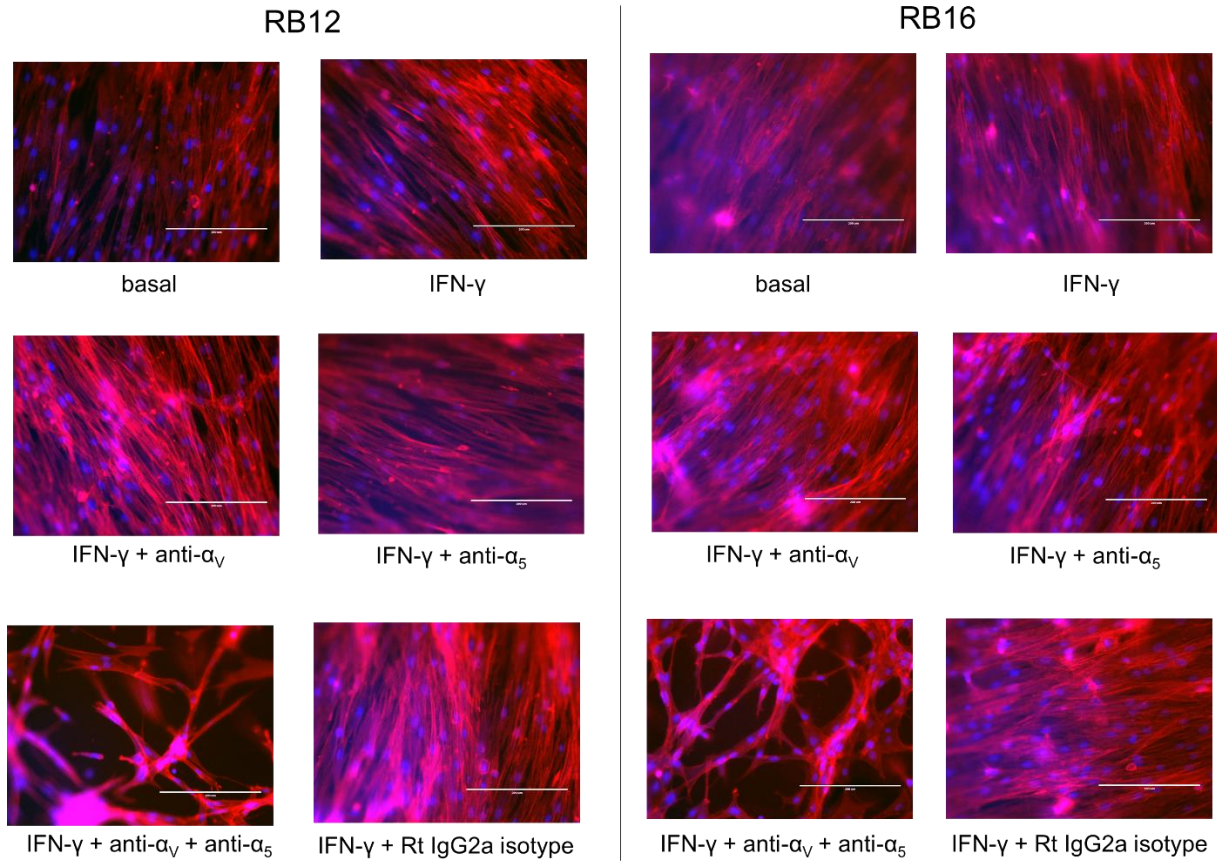

**Fig. S10. Engagement of  $\alpha_v$  and  $\alpha_5$  integrins regulates morphology of IFN- $\gamma$  licensed MSCs on fibrin.** Representative images showing MSCs cultured on fibrin hydrogels in the presence of basal media, IFN- $\gamma$  licensing, IFN- $\gamma$  licensing with  $\alpha_v$  inhibitor, IFN- $\gamma$  licensing with  $\alpha_5$  inhibitor, IFN- $\gamma$  licensing with  $\alpha_v$  +  $\alpha_5$  inhibitors, or IFN- $\gamma$  licensing with rat IgG2a isotype control antibody. Blue = DAPI, Red = phalloidin F-actin staining, Scale Bar = 200  $\mu$ m.

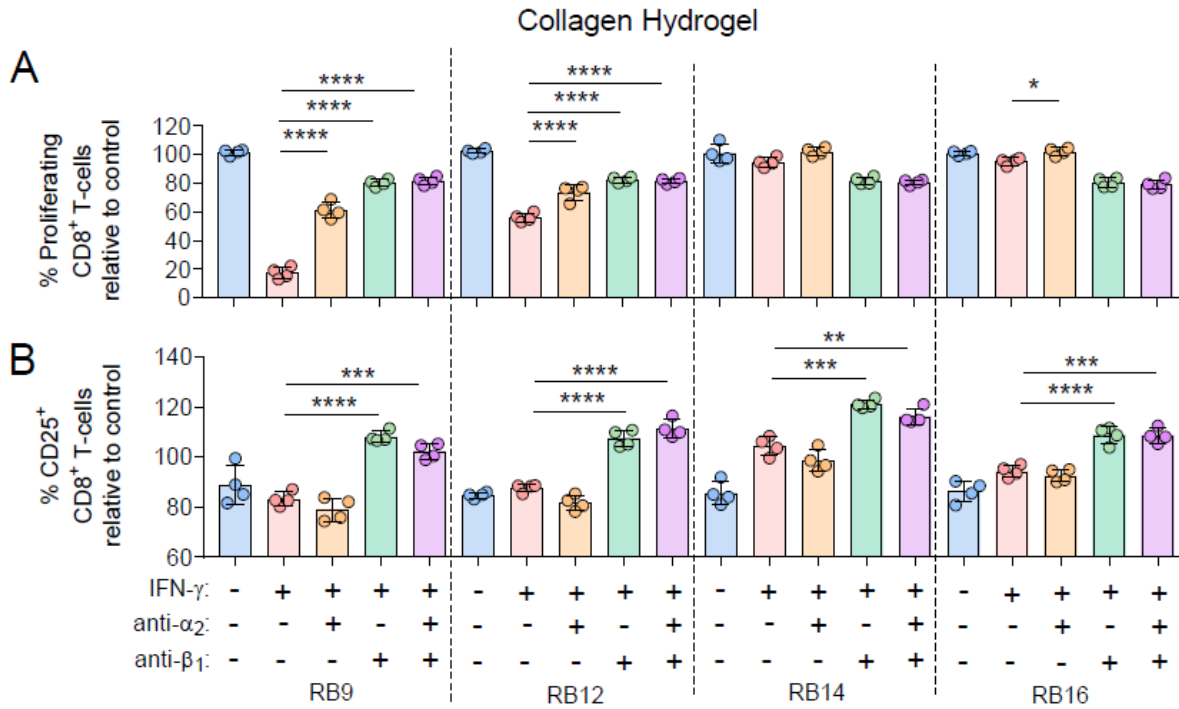

**Fig. S11. Engagement of  $\alpha_2$  and  $\beta_1$  integrins regulates immunosuppressive capacity of IFN- $\gamma$  licensed MSCs on collagen.** (A and B) (A) The percent proliferating and (B) CD25<sup>+</sup> CD8<sup>+</sup> T-cells in the presence of various MSCs lines, with and without IFN- $\gamma$  licensing, cultured on collagen, with and without the addition of inhibitors to  $\alpha_2$  and/or  $\beta_1$  integrin binding. Labels for groups in (A-B) are shown in (B).  $n = 4$  for all data sets. Data are presented as means  $\pm$  SD. Significance is denoted by  $*P \leq 0.05$ ,  $**P \leq 0.01$ ,  $***P \leq 0.001$ , or  $****P \leq 0.0001$  by one-way analysis of variance (ANOVA) with Tukey's post hoc test; separate comparisons were made between conditions of each donor.

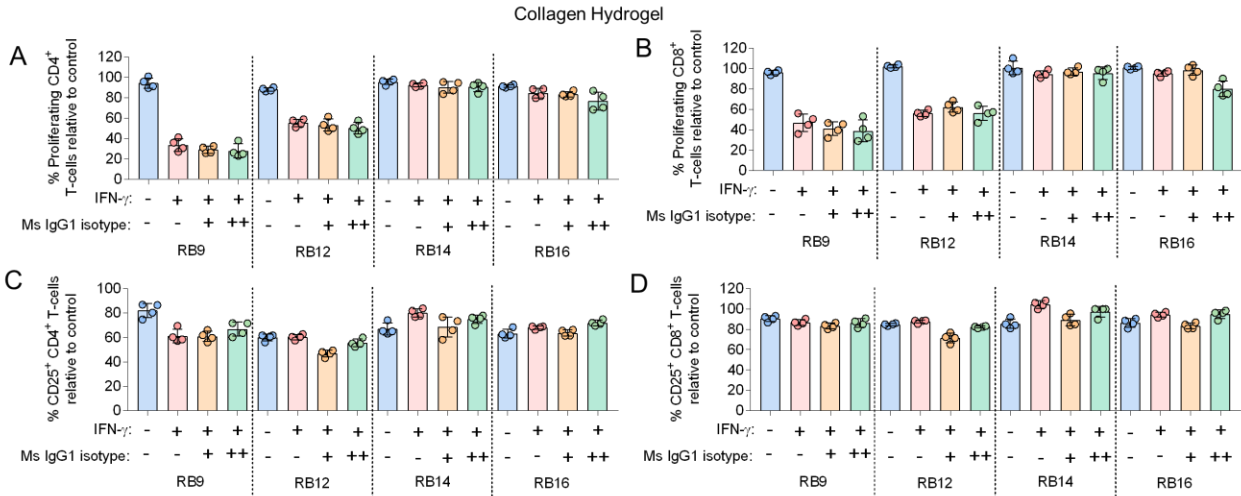

**Fig. S12. Role of collagen integrin isotype antibodies on immunosuppressive capacity of IFN- $\gamma$  licensed MSCs on collagen.** (A and B) The percent proliferating (A) CD4<sup>+</sup> and (B) CD8<sup>+</sup> T-cells in the presence of MSC lines, cultured on collagen with and without IFN- $\gamma$  licensing and the addition of varying concentrations of mouse IgG1 $\kappa$  isotype control antibody. (C and D) The percent CD25<sup>+</sup> (C) CD4<sup>+</sup> and (D) CD8<sup>+</sup> T-cells in the presence of MSC lines, cultured on collagen with and without IFN- $\gamma$  licensing and the addition of varying concentrations of mouse IgG1 $\kappa$  isotype control antibody. For the mouse IgG1 $\kappa$  isotype control antibody condition, ‘+’ denotes 10  $\mu\text{g}/\text{mL}$  and ‘++’ denotes 20  $\mu\text{g}/\text{mL}$ . 20  $\mu\text{g}/\text{mL}$  of mouse IgG1 $\kappa$  isotype control antibody was tested as a control condition for adding both the anti- $\alpha_2$  and anti- $\beta_1$  integrin blocking antibodies together. Data are presented as means  $\pm$  SD.

## Collagen Hydrogel

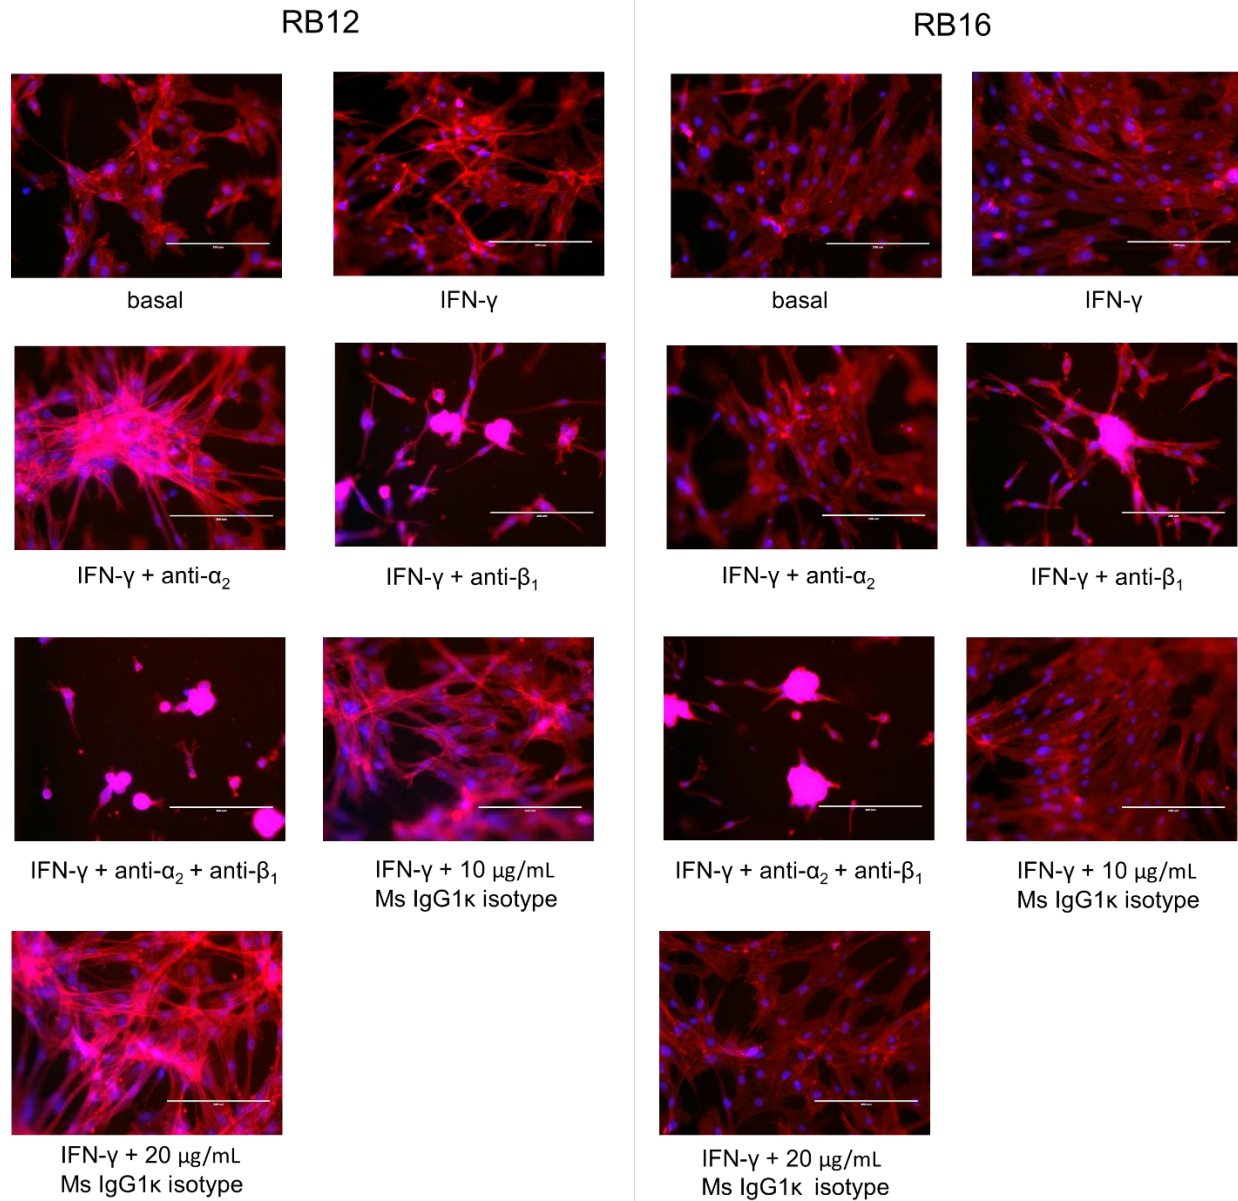

**Fig. S13. Engagement of  $\alpha_2$  and  $\beta_1$  integrins regulates morphology of IFN- $\gamma$  licensed MSCs on collagen.** Representative images showing MSCs cultured on collagen hydrogels in the presence of basal media, IFN- $\gamma$  licensing, IFN- $\gamma$  licensing with  $\alpha_2$  inhibitor, IFN- $\gamma$  licensing with  $\beta_1$  inhibitor, IFN- $\gamma$  licensing with  $\alpha_2 + \beta_1$  inhibitors, IFN- $\gamma$  licensing with 10  $\mu\text{g}/\text{mL}$  mouse IgG1 $\kappa$  isotype control antibody, or IFN- $\gamma$  licensing with 20  $\mu\text{g}/\text{mL}$  mouse IgG1 $\kappa$  isotype control antibody. Blue = DAPI, Red = phalloidin F-actin staining, Scale Bar = 200  $\mu\text{m}$ .

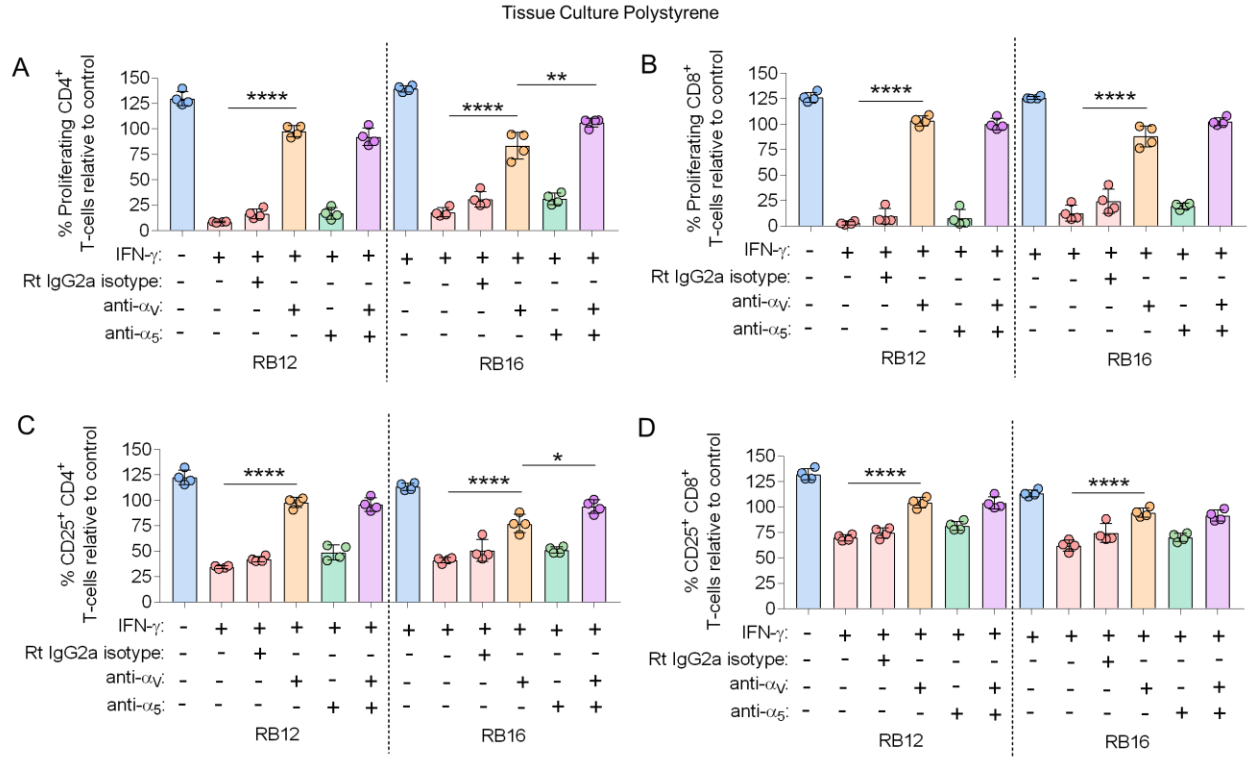

**Fig. S14. Engagement of  $\alpha_V$  and  $\alpha_5$  integrins regulates immunosuppressive capacity of IFN- $\gamma$  licensed MSCs on tissue culture polystyrene.** (A and B) The percent proliferating (A) CD4<sup>+</sup> and (B) CD8<sup>+</sup> T-cells in the presence of various MSC lines, with and without IFN- $\gamma$  licensing, cultured on tissue culture polystyrene, with and without the addition of inhibitors to  $\alpha_V$  and/or  $\alpha_5$  integrin binding or a rat IgG2a isotype control antibody. (C and D) The percent CD25<sup>+</sup> (C) CD4<sup>+</sup> and (D) CD8<sup>+</sup> T-cells in the presence of various MSC lines, with and without IFN- $\gamma$  licensing, cultured on tissue culture polystyrene, with and without the addition of inhibitors to  $\alpha_V$  and/or  $\alpha_5$  integrin binding or a rat IgG2a isotype control antibody. Data are presented as means  $\pm$  SD. Significance is denoted by \* $P \leq 0.05$ , \*\* $P \leq 0.01$ , or \*\*\*\* $P \leq 0.0001$  by one-way analysis of variance (ANOVA) with Tukey's post hoc test; separate comparisons were made between conditions of each cell line.

## Tissue Culture Polystyrene

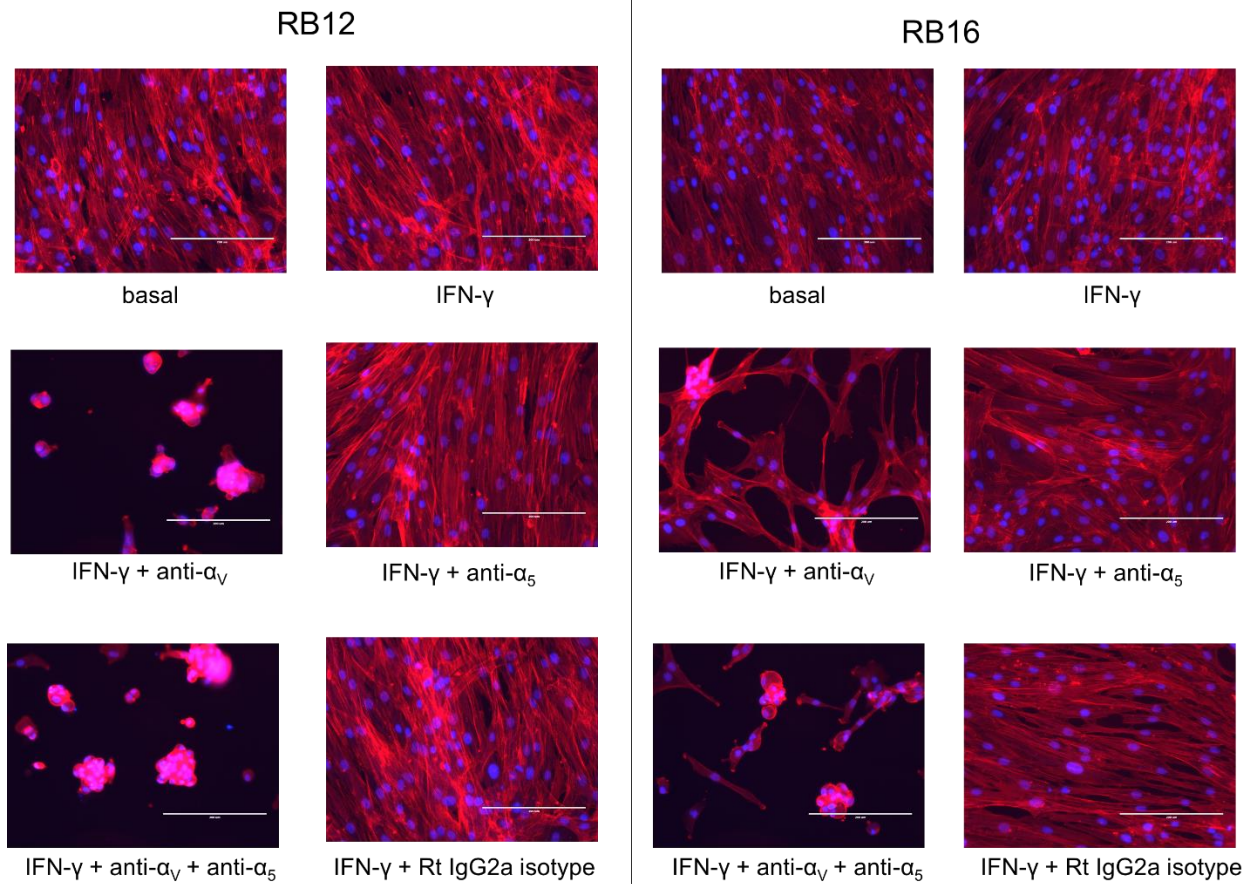

**Fig. S15. Engagement of  $\alpha_v$  and  $\alpha_5$  integrins regulates morphology of IFN- $\gamma$  licensed MSCs on tissue culture polystyrene.** Representative images showing MSCs cultured on tissue culture polystyrene in the presence of basal media, IFN- $\gamma$  licensing, IFN- $\gamma$  licensing with  $\alpha_v$  inhibitor, IFN- $\gamma$  licensing with  $\alpha_5$  inhibitor, IFN- $\gamma$  licensing with  $\alpha_v$  +  $\alpha_5$  inhibitors, or IFN- $\gamma$  licensing with rat IgG2a isotype control antibody. Blue = DAPI, Red = phalloidin F-actin staining, Scale Bar = 200  $\mu$ m.

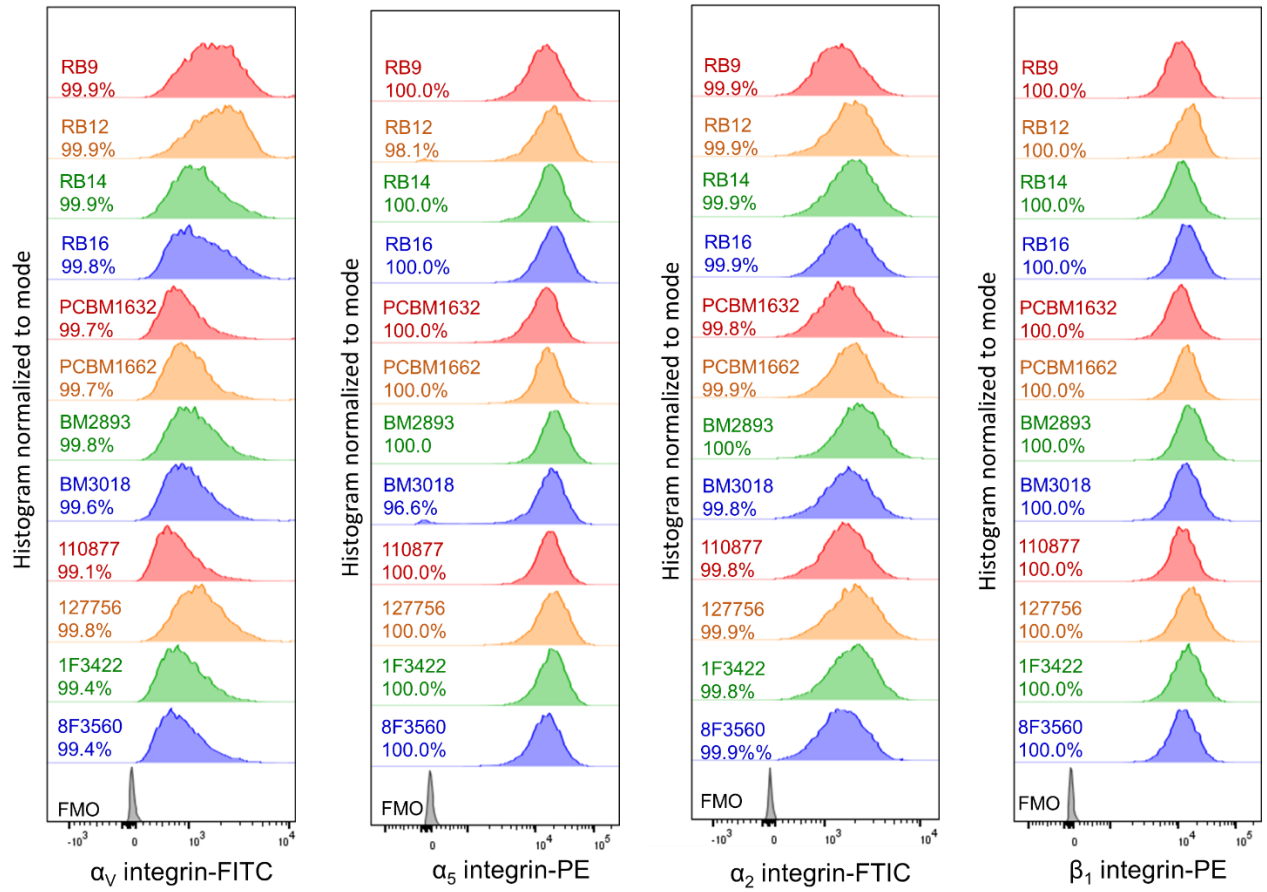

**Fig. S16.** FACS plots of  $\alpha_v$ ,  $\alpha_5$ ,  $\alpha_2$ , and  $\beta_1$  integrin expression for various, unlicensed MSC cell lines, denoting the percent positivity of each cell line.



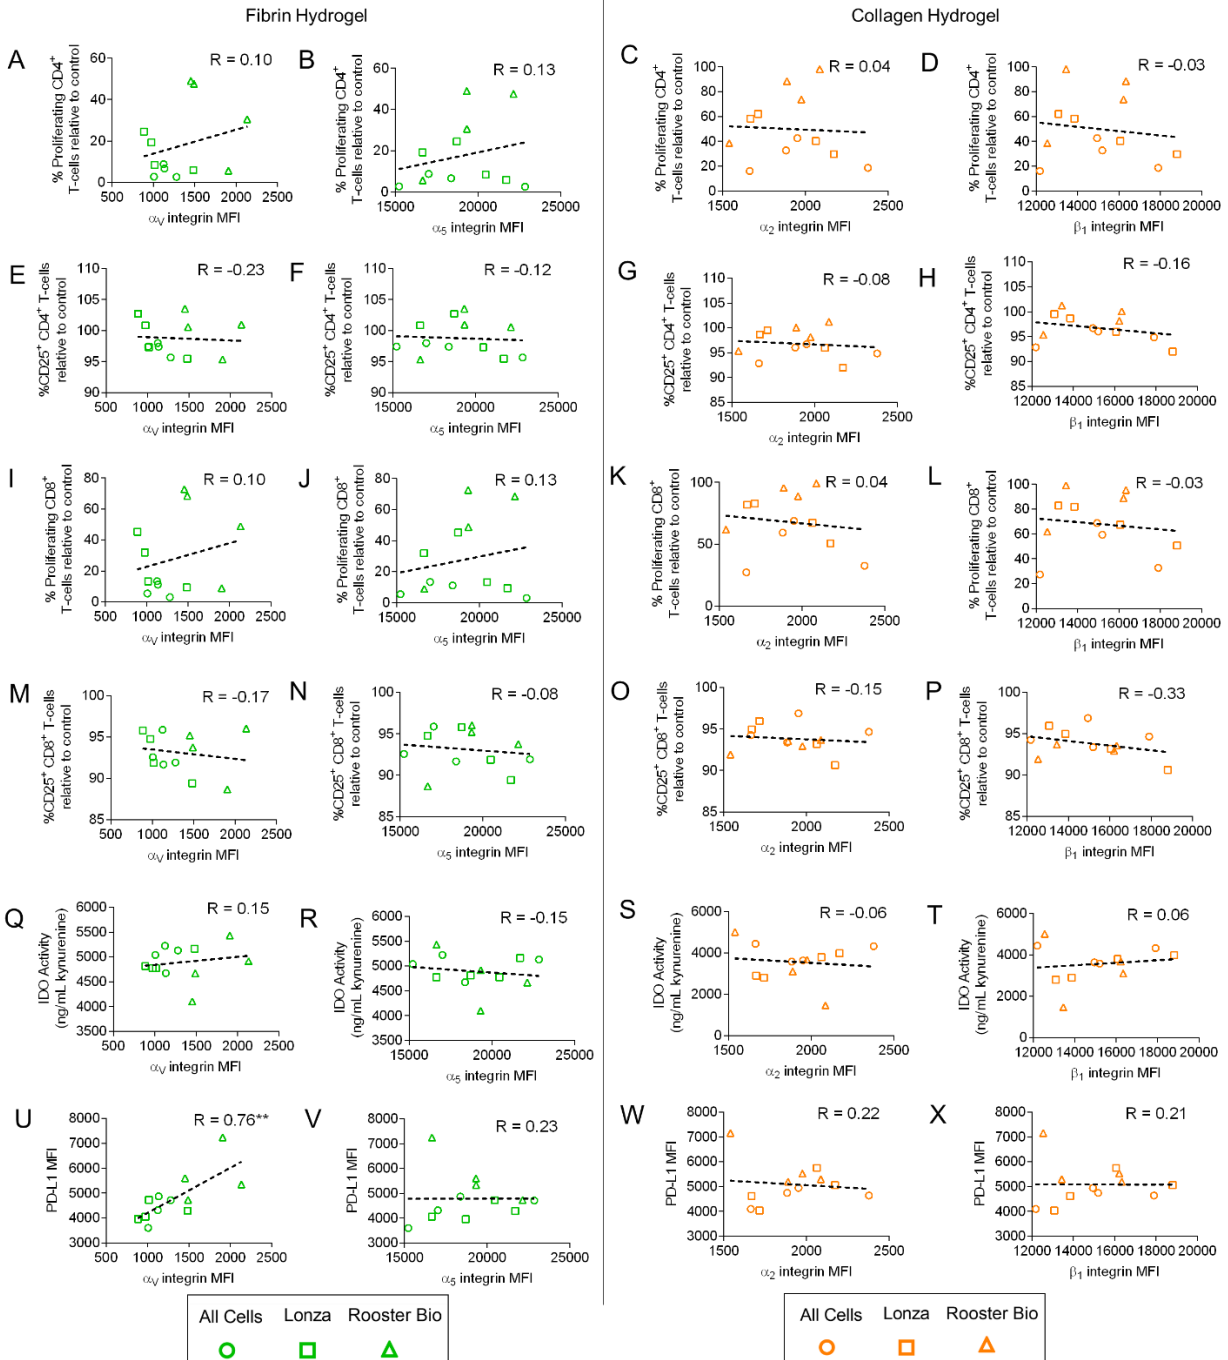

**Fig. S17. Magnitude of integrin expression does not correlate with donor-to-donor variability of IFN- $\gamma$  licensed MSC functional immunosuppressive capacity on biomaterials.** (A to D) Correlation of percent proliferating CD4<sup>+</sup> T-cells in the presence of IFN- $\gamma$  licensed MSC lines on (A,B) fibrin and (C,D) collagen with (A)  $\alpha_v$ , (B)  $\alpha_5$ , (C)  $\alpha_2$ , and (D)  $\beta_1$  integrin expression on MSC lines. (E to H) Correlation of CD25<sup>+</sup> CD4<sup>+</sup> T-cells in the presence of IFN- $\gamma$  licensed MSC lines on (E,F) fibrin and (G,H) collagen with (E)  $\alpha_v$ , (F)  $\alpha_5$ , (G)  $\alpha_2$ , and (H)  $\beta_1$  integrin expression on MSC lines. (I to L) Correlation of percent proliferating CD8<sup>+</sup> T-cells in the presence of IFN- $\gamma$  licensed MSC lines on (I,J) fibrin and (K,L) collagen with (I)  $\alpha_v$ , (J)  $\alpha_5$ , (K)  $\alpha_2$ , and (L)  $\beta_1$  integrin expression on MSC lines. (M to P) Correlation of CD25<sup>+</sup> CD8<sup>+</sup> T-cells in the presence of IFN- $\gamma$

licensed MSC lines on (M,N) fibrin and (O,P) collagen with (M)  $\alpha_v$ , (N)  $\alpha_5$ , (O)  $\alpha_2$ , and (P)  $\beta_1$  integrin expression on MSC lines. (Q to T) Correlation of IDO activity of IFN- $\gamma$  licensed MSC lines on (Q,R) fibrin and (S,T) collagen with (Q)  $\alpha_v$ , (R)  $\alpha_5$ , (S)  $\alpha_2$ , and (T)  $\beta_1$  integrin expression on MSC lines. (U to X) Correlation of PD-L1 mean fluorescence intensity (MFI) of IFN- $\gamma$  licensed MSC lines on (U,V) fibrin and (W,X) collagen with (U)  $\alpha_v$ , (V)  $\alpha_5$ , (W)  $\alpha_2$ , and (X)  $\beta_1$  integrin expression on MSC lines. Significance is denoted by  $*P \leq 0.05$  by two-tailed Spearman's rank correlation.

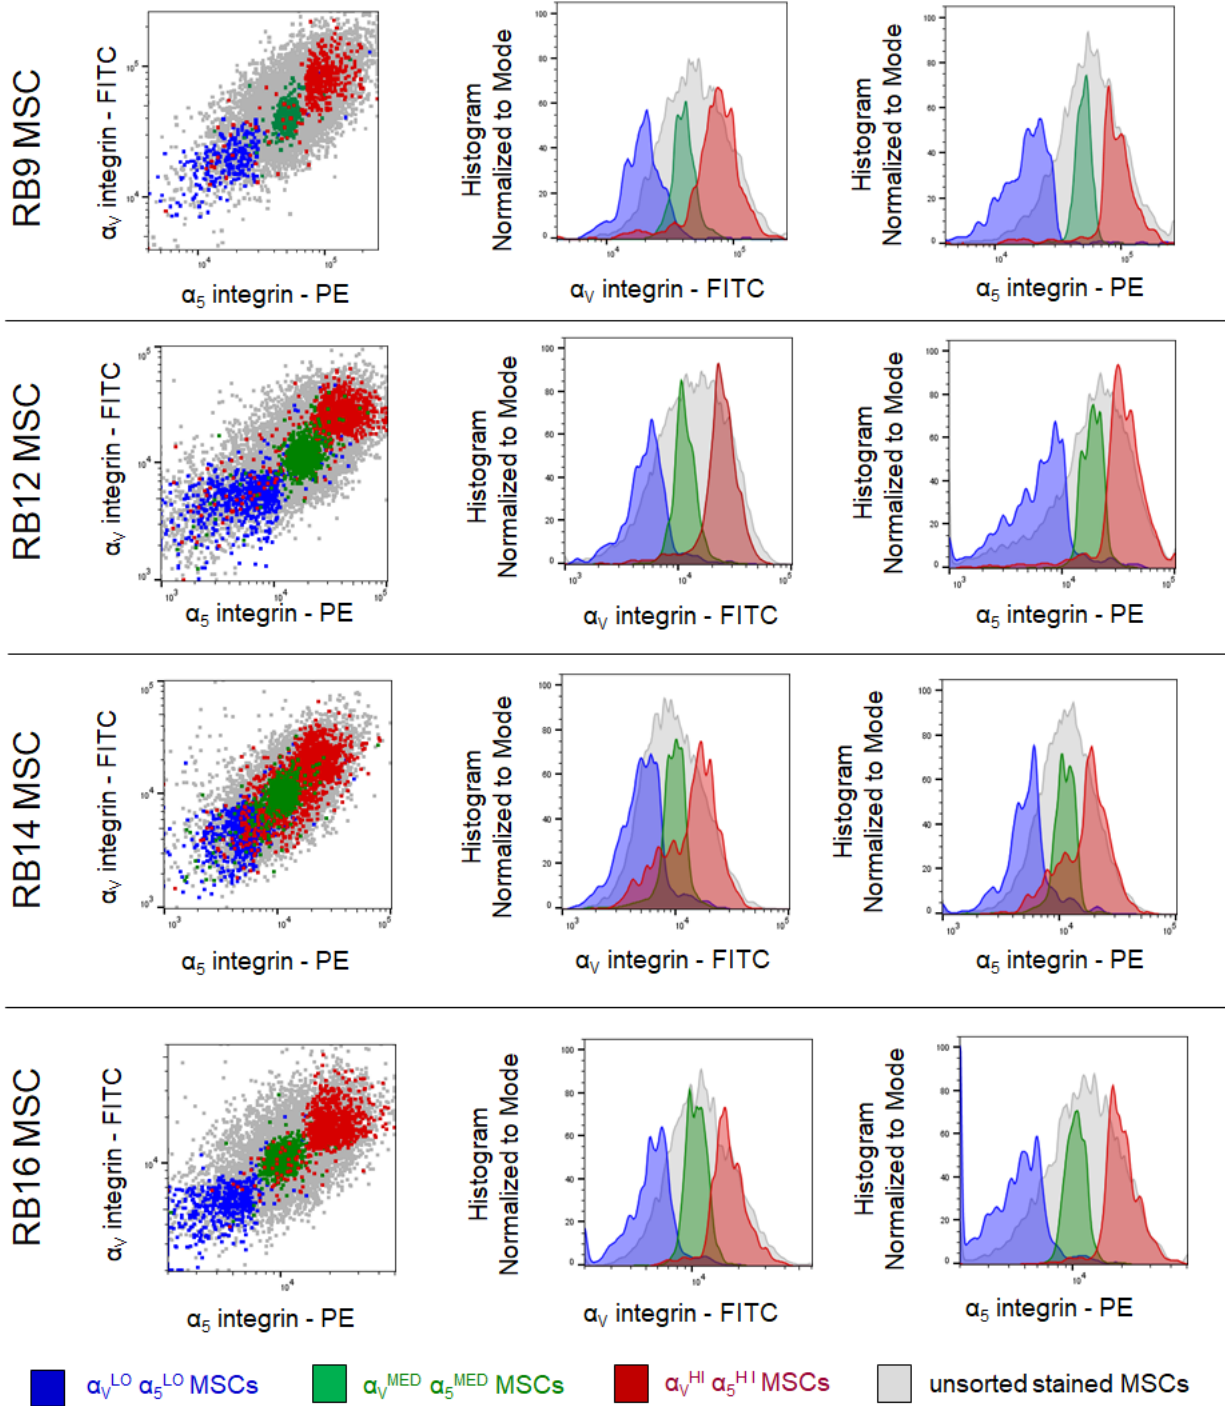

**Fig. S18. FACS sorted MSCs by RGD integrins.** Representative FACS plots of MSCs FACS sorted by magnitude of  $\alpha_V$  and  $\alpha_5$  integrins for each MSC cell line.

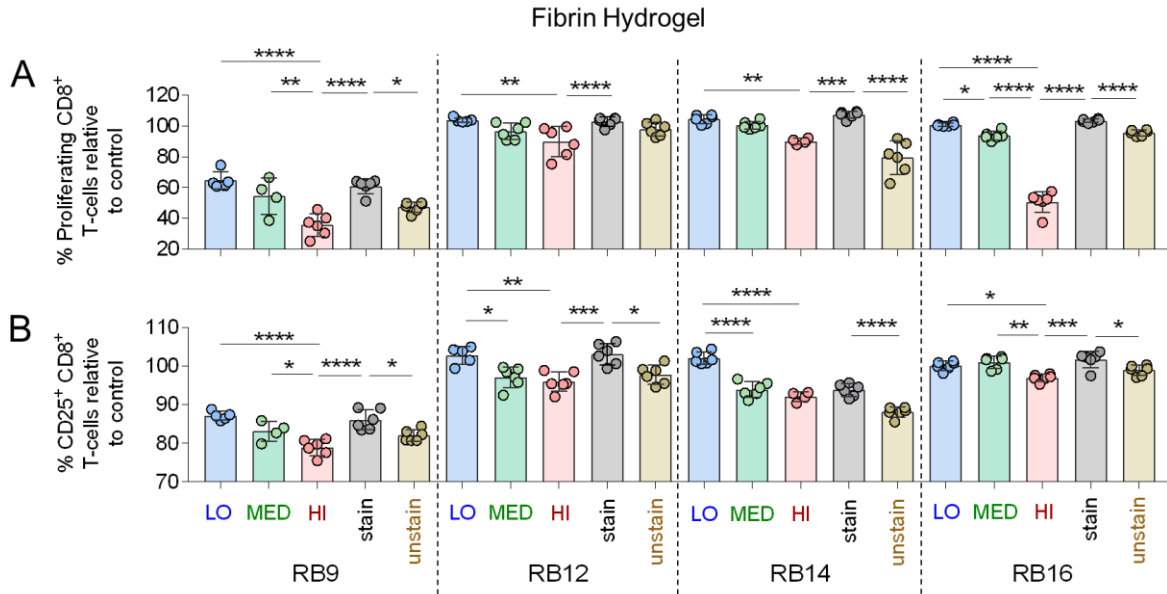

**Fig. S19. Magnitude of  $\alpha_V$  and  $\alpha_5$  integrins identifies MSC subpopulations of varying immunosuppressive capacity on fibrin hydrogels.** (A) The percent proliferating and (B) CD25<sup>+</sup> CD8<sup>+</sup> T-cells in the presence of FACS sorted or unsorted MSC lines with IFN- $\gamma$  licensing, cultured on fibrin. Labels for groups in (A-B) are shown in (B), where ‘LO’ denotes  $\alpha_V^{\text{LO}}\alpha_5^{\text{LO}}$  expressing MSCs, ‘MED’ denotes  $\alpha_V^{\text{MED}}\alpha_5^{\text{MED}}$  expressing MSCs, ‘HI’ denotes  $\alpha_V^{\text{HI}}\alpha_5^{\text{HI}}$  expressing MSCs, ‘stain’ denotes unsorted MSCs stained with FACS sorting antibodies, and ‘unstain’ denotes unsorted, unstained MSCs.  $n = 4-6$  for all data sets. Data are presented as means  $\pm$  SD. Significance is denoted by \* $P \leq 0.05$ , \*\* $P \leq 0.01$ , \*\*\* $P \leq 0.001$ , or \*\*\*\* $P \leq 0.0001$  by one-way analysis of variance (ANOVA) with Tukey’s post hoc test; separate comparisons were made between conditions of each cell line.

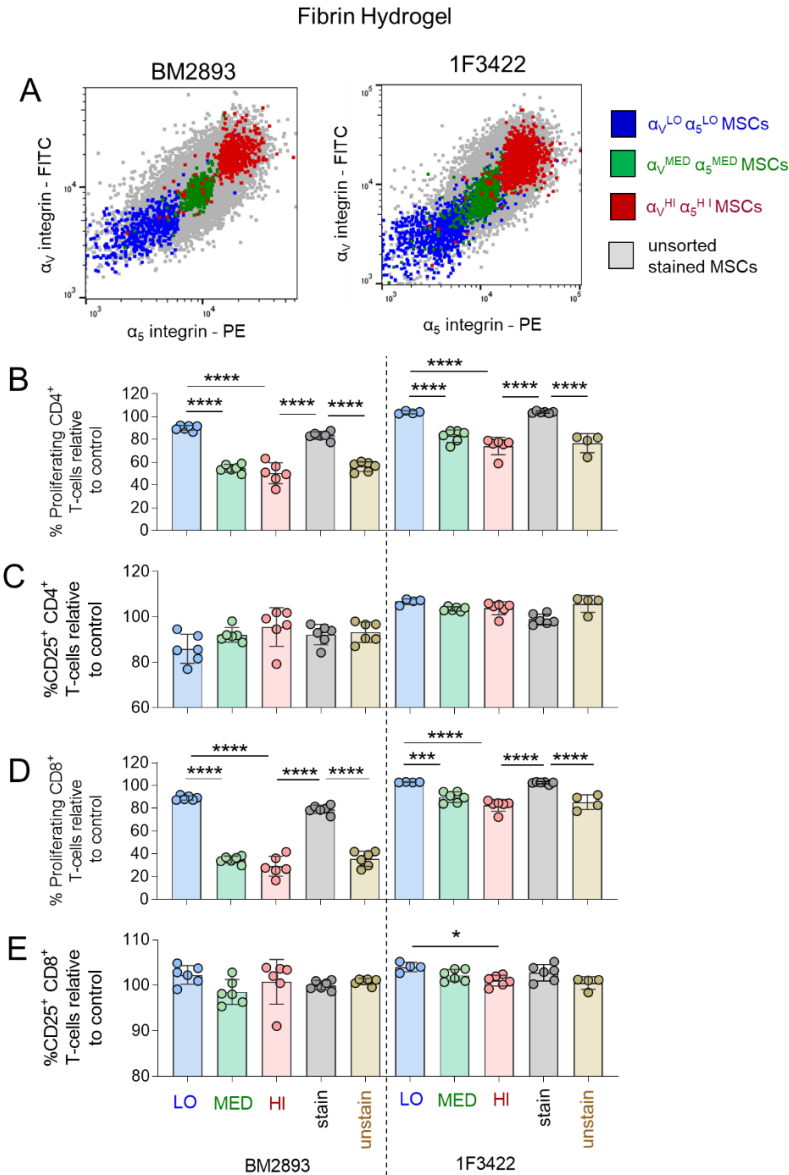

**Fig. S20. Magnitude of  $\alpha_v$  and  $\alpha_5$  integrins identifies MSC subpopulations of varying immunosuppressive capacity on fibrin hydrogels.** A representative MSC line obtained from All Cells (BM2893) and a representative MSC line from Lonza (1F3422) were evaluated. (A) FACS plots of FACS sorted  $\alpha_v^{LO} \alpha_5^{LO}$  expressing MSCs,  $\alpha_v^{MED} \alpha_5^{MED}$  expressing MSCs, and  $\alpha_v^{HI} \alpha_5^{HI}$  expressing MSCs and unsorted MSCs. (B and C) (B) The percent proliferating and (C) CD25<sup>+</sup> CD4<sup>+</sup> T-cells in the presence of FACS sorted or unsorted MSCs lines with IFN- $\gamma$  licensing, cultured on fibrin. (D and E) (D) The percent proliferating and (E) CD25<sup>+</sup> CD8<sup>+</sup> T-cells in the presence of FACS sorted or unsorted MSCs lines with IFN- $\gamma$  licensing, cultured on fibrin. Labels for groups in (B-E) are shown in (E), where ‘LO’ denotes  $\alpha_v^{LO} \alpha_5^{LO}$  expressing MSCs, ‘MED’ denotes  $\alpha_v^{MED} \alpha_5^{MED}$  expressing MSCs, ‘HI’ denotes  $\alpha_v^{HI} \alpha_5^{HI}$  expressing MSCs, ‘stain’ denotes unsorted MSCs stained with FACS sorting antibodies, and ‘unstain’ denotes unsorted, unstained MSCs. Data are presented as means  $\pm$  SD. Significance is denoted by \* $P \leq 0.05$ , \*\*\* $P \leq 0.001$ , or \*\*\*\* $P \leq 0.0001$  by one-way analysis of variance (ANOVA) with Tukey’s post hoc test; separate comparisons were made between conditions of each cell line.

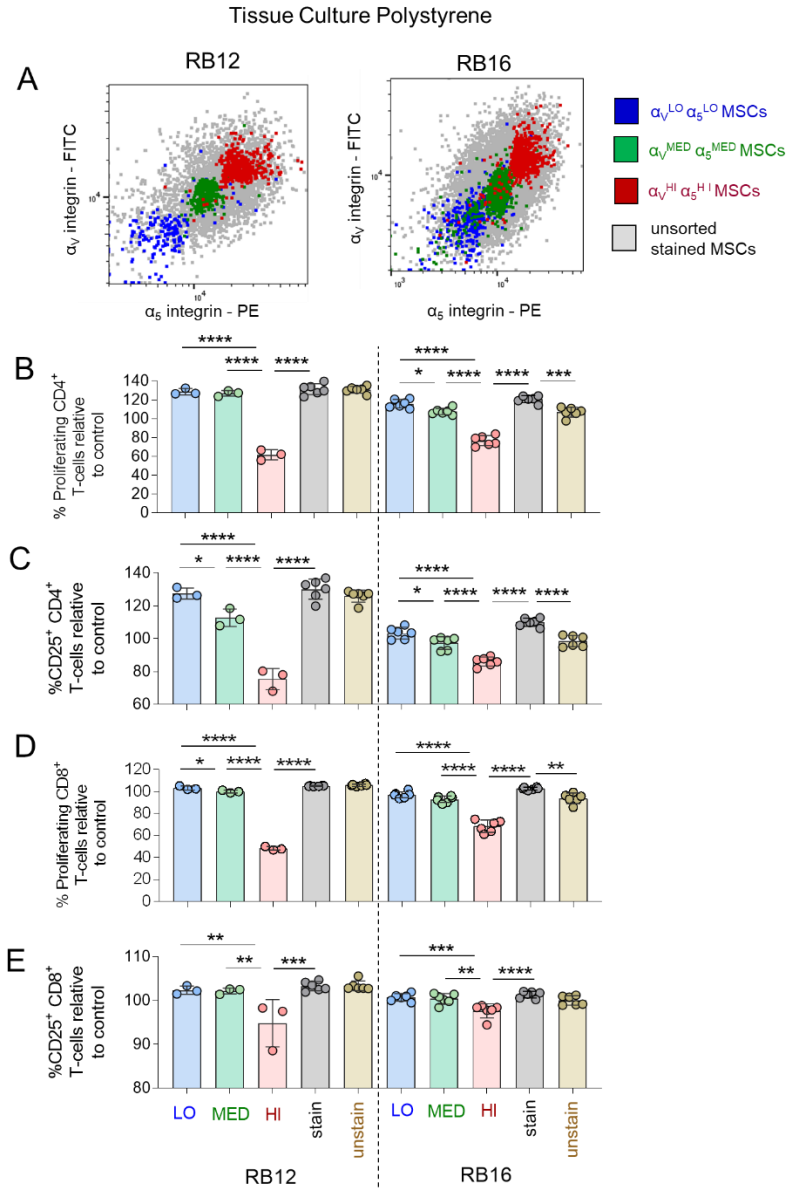

**Fig. S21. Magnitude of  $\alpha_V$  and  $\alpha_5$  integrins identifies MSC subpopulations of varying immunosuppressive capacity on tissue culture polystyrene.** (A) FACS plots of FACS sorted  $\alpha_V^{LO} \alpha_5^{LO}$  expressing MSCs,  $\alpha_V^{MED} \alpha_5^{MED}$  expressing MSCs, and  $\alpha_V^{HI} \alpha_5^{HI}$  expressing MSCs and unsorted MSCs. (B and C) (B) The percent proliferating and (C) CD25<sup>+</sup> CD4<sup>+</sup> T-cells in the presence of FACS sorted or unsorted MSCs lines with IFN- $\gamma$  licensing, cultured on TCPS. (D and E) (D) The percent proliferating and (E) CD25<sup>+</sup> CD8<sup>+</sup> T-cells in the presence of FACS sorted or unsorted MSCs lines with IFN- $\gamma$  licensing, cultured on TCPS. Labels for groups in (B-E) are shown in (E), where ‘LO’ denotes  $\alpha_V^{LO} \alpha_5^{LO}$  expressing MSCs, ‘MED’ denotes  $\alpha_V^{MED} \alpha_5^{MED}$  expressing MSCs, ‘HI’ denotes  $\alpha_V^{HI} \alpha_5^{HI}$  expressing MSCs, ‘stain’ denotes unsorted MSCs stained with FACS sorting antibodies, and ‘unstain’ denotes unsorted, unstained MSCs. Data are presented as means  $\pm$  SD. Significance is denoted by \* $P \leq 0.05$ , \*\* $P \leq 0.01$ , \*\*\* $P \leq 0.001$ , or \*\*\*\* $P \leq 0.0001$  by one-way analysis of variance (ANOVA) with Tukey’s post hoc test; separate comparisons were made between conditions of each cell line.

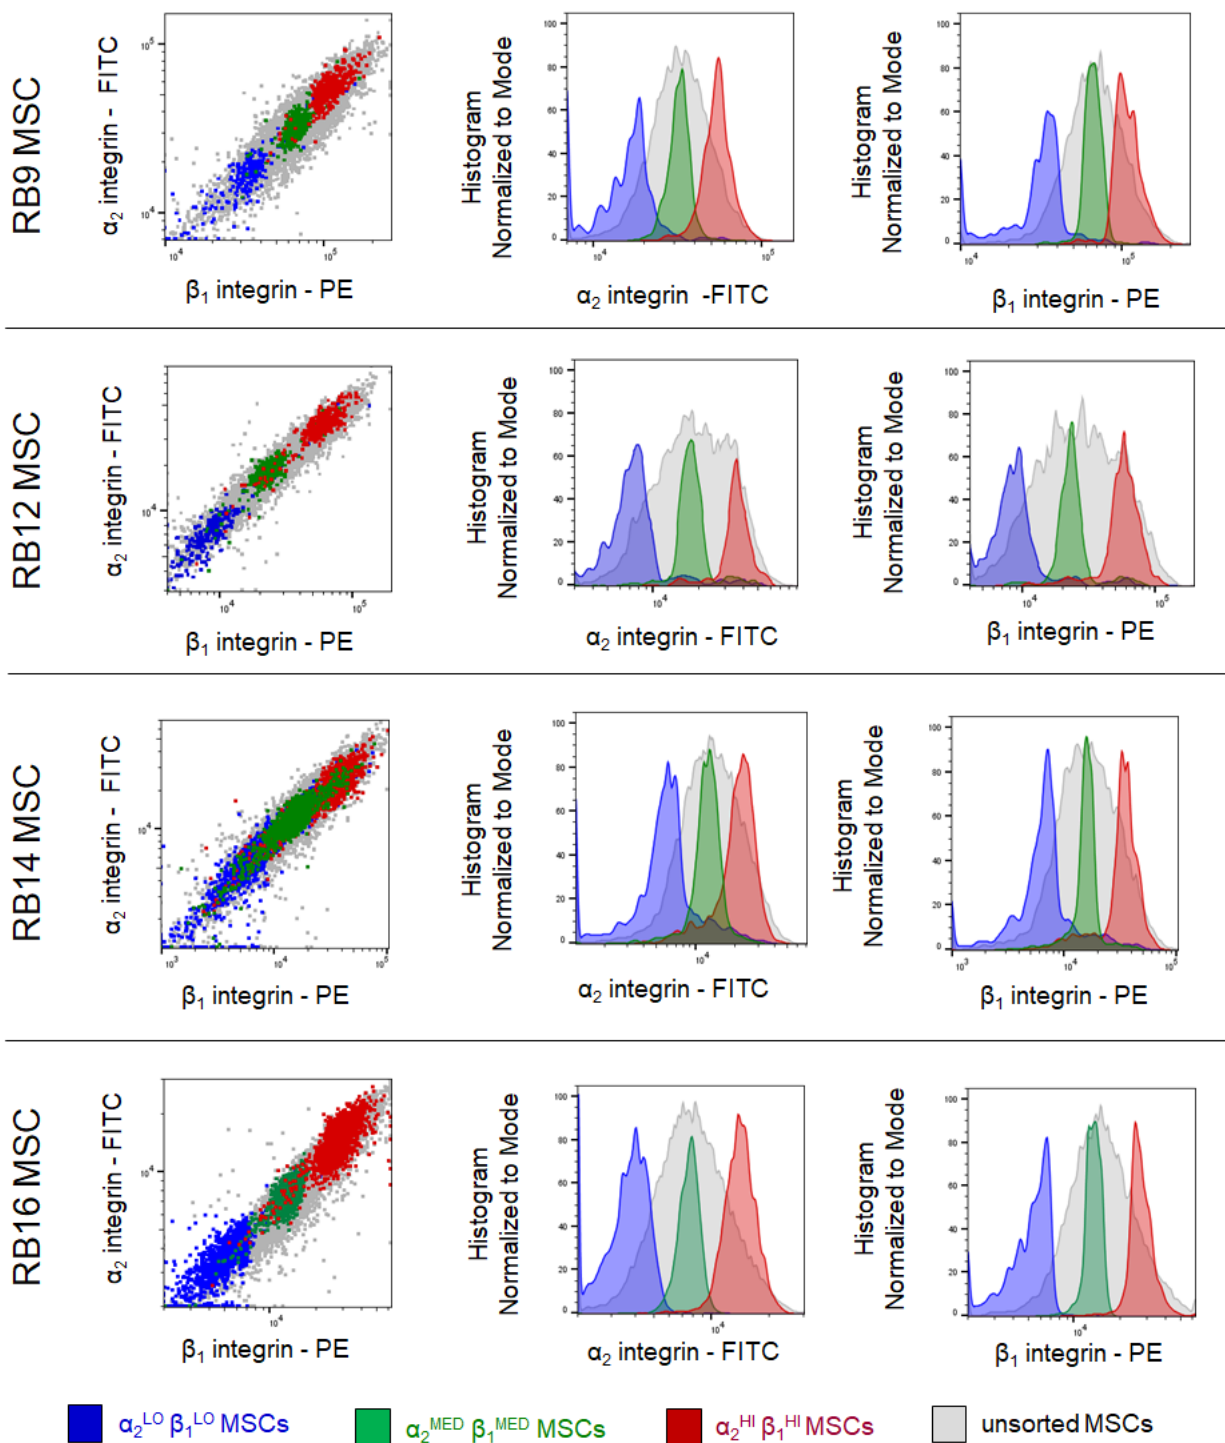

**Fig. S22. FACS sorted MSCs by collagen integrins.** Representative FACS plots of MSCs FACS sorted by magnitude of  $\alpha_2$  and  $\beta_1$  integrins for each MSC cell line.

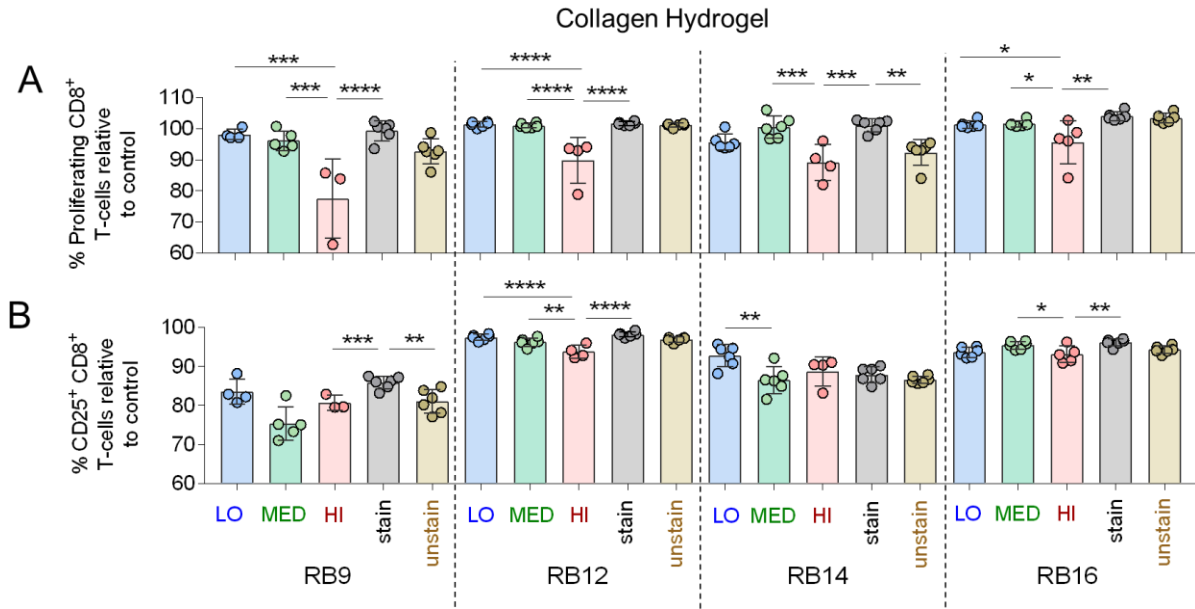

**Fig. S23. Magnitude of  $\alpha_2$  and  $\beta_1$  integrins identifies MSC subpopulations of varying immunosuppressive capacity on collagen hydrogels.** (A) The percent proliferating and (B) CD25<sup>+</sup> CD8<sup>+</sup> T-cells in the presence of FACS sorted or unsorted MSCs lines with IFN- $\gamma$  licensing, cultured on collagen. Labels for groups in (A-B) are shown in (B), where ‘LO’ denotes  $\alpha_2^{\text{LO}}\beta_1^{\text{LO}}$  expressing MSCs, ‘MED’ denotes  $\alpha_2^{\text{MED}}\beta_1^{\text{MED}}$  expressing MSCs, ‘HI’ denotes  $\alpha_2^{\text{HI}}\beta_1^{\text{HI}}$  expressing MSCs, ‘stain’ denotes unsorted MSCs stained with FACS sorting antibodies, and ‘unstain’ denotes unsorted, unstained MSCs.  $n = 3-6$  for all data sets. Data are presented as means  $\pm$  SD. Significance is denoted by \* $P \leq 0.05$ , \*\* $P \leq 0.01$ , \*\*\* $P \leq 0.001$ , or \*\*\*\* $P \leq 0.0001$  by one-way analysis of variance (ANOVA) with Tukey’s post hoc test; separate comparisons were made between conditions of each cell line.



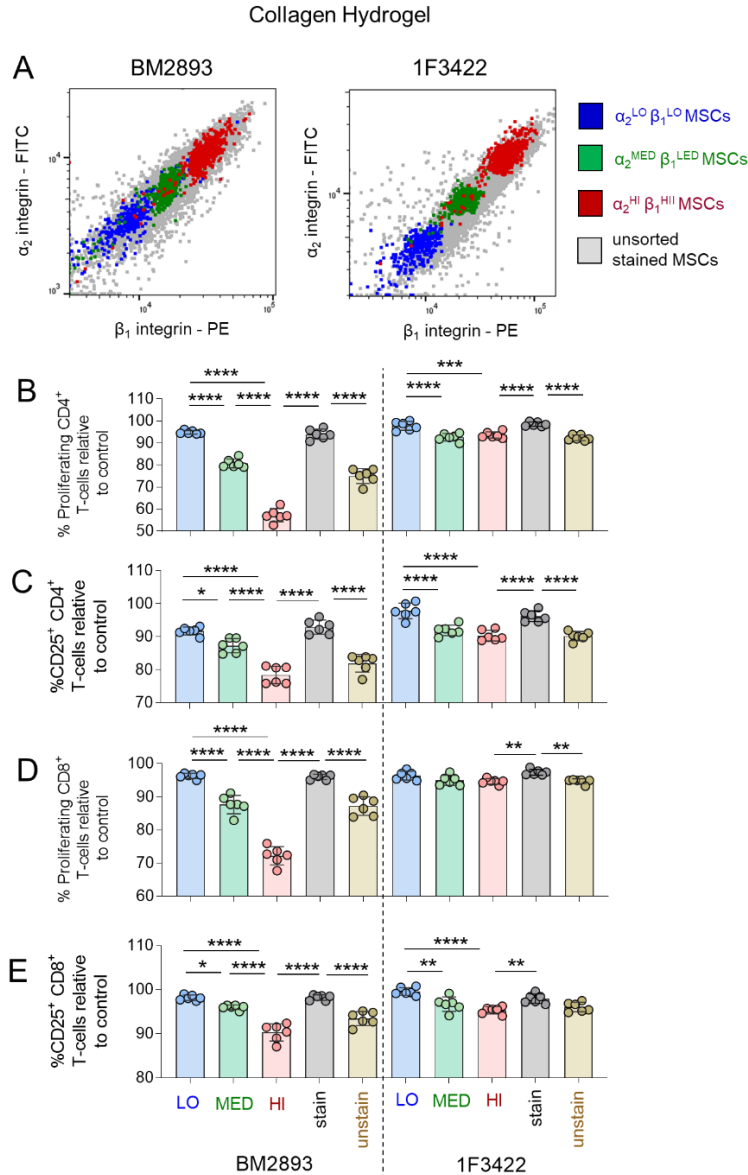

**Fig. S24. Magnitude of  $\alpha_2$  and  $\beta_1$  integrins identifies MSC subpopulations of varying immunosuppressive capacity on collagen hydrogels.** A representative MSC line obtained from All Cells (BM2893) and a representative MSC line from Lonza (1F3422) were evaluated. (A) FACS plots of FACS sorted  $\alpha_2^{\text{LO}}\beta_1^{\text{LO}}$  expressing MSCs,  $\alpha_2^{\text{MED}}\beta_1^{\text{MED}}$  expressing MSCs, and  $\alpha_2^{\text{HI}}\beta_1^{\text{HI}}$  expressing MSCs with unsorted MSCs. (B and C) (B) The percent proliferating and (C) CD25<sup>+</sup> CD4<sup>+</sup> T-cells in the presence of FACS sorted or unsorted MSCs lines with IFN- $\gamma$  licensing, cultured on collagen. (D and E) (D) The percent proliferating and (E) CD25<sup>+</sup> CD8<sup>+</sup> T-cells in the presence of FACS sorted or unsorted MSCs lines with IFN- $\gamma$  licensing, cultured on collagen. Labels for groups in (B-E) are shown in (E), where ‘LO’ denotes  $\alpha_2^{\text{LO}}\beta_1^{\text{LO}}$  expressing MSCs, ‘MED’ denotes  $\alpha_2^{\text{MED}}\beta_1^{\text{MED}}$  expressing MSCs, ‘HI’ denotes  $\alpha_2^{\text{HI}}\beta_1^{\text{HI}}$  expressing MSCs, ‘stain’ denotes unsorted MSCs stained with FACS sorting antibodies, and ‘unstain’ denotes unsorted, unstained MSCs. Data are presented as means  $\pm$  SD. Significance is denoted by \* $P \leq 0.05$ , \*\* $P \leq 0.01$ , \*\*\* $P \leq 0.001$ , or \*\*\*\* $P \leq 0.0001$  by one-way analysis of variance (ANOVA) with Tukey’s post hoc test; separate comparisons were made between conditions of each cell line.

| <b>Trial Number</b> | <b>Status</b>           | <b>Clinical Indication</b>                                                                                                                                      | <b>Cells</b>                                 | <b>Biomaterial(s)</b>                         |
|---------------------|-------------------------|-----------------------------------------------------------------------------------------------------------------------------------------------------------------|----------------------------------------------|-----------------------------------------------|
| NCT00850187         | Completed               | <ul style="list-style-type: none"> <li>• Knee Osteoarthritis</li> </ul>                                                                                         | Autologous bone marrow derived MSCs          | Collagen                                      |
| NCT01159899         | Unknown                 | <ul style="list-style-type: none"> <li>• Osteoarthritis</li> <li>• Knee Osteoarthritis</li> <li>• Osteochondritis Dissecans</li> <li>• Osteonecrosis</li> </ul> | Autologous bone marrow derived MSCs          | Collagen                                      |
| NCT01958502         | Unknown                 | <ul style="list-style-type: none"> <li>• Nonunion of Fracture</li> </ul>                                                                                        | Bone marrow derived MSCs                     | Collagen                                      |
| NCT03724617         | Completed               | <ul style="list-style-type: none"> <li>• Thin Endometrium</li> <li>• Intrauterine Adhesion</li> </ul>                                                           | Umbilical Cord MSC                           | Collagen                                      |
| NCT03592849         | Enrolling by invitation | <ul style="list-style-type: none"> <li>• Infertility, female</li> <li>• Endometrium</li> </ul>                                                                  | Umbilical cord derived MSCs                  | Collagen                                      |
| NCT03563495         | Completed               | <ul style="list-style-type: none"> <li>• Cleft lip and palate</li> </ul>                                                                                        | Autologous bone marrow derived MSCs          | Collagen                                      |
| NCT03509870         | Terminated              | <ul style="list-style-type: none"> <li>• Diabetic Foot Ulcer</li> </ul>                                                                                         | Allogenic bone marrow derived MSCs           | Collagen                                      |
| NCT04446884         | Completed               | <ul style="list-style-type: none"> <li>• Stress Urinary Incontinence</li> </ul>                                                                                 | Autologous adipose derived MSCs              | Collagen                                      |
| NCT04434794         | Completed               | <ul style="list-style-type: none"> <li>• Gingival Recession</li> </ul>                                                                                          | Autologous adipose derived MSCs              | Collagen                                      |
| NCT02005861         | Unknown                 | <ul style="list-style-type: none"> <li>• Osteochondritis</li> </ul>                                                                                             | Bone marrow derived MSCs                     | Collagen                                      |
| NCT02947191         | Active, not recruiting  | <ul style="list-style-type: none"> <li>• Chronic Nasal Septum Perforation</li> </ul>                                                                            | Umbilical cord derived MSCs                  | Collagen                                      |
| NCT02786017         | Unknown                 | <ul style="list-style-type: none"> <li>• Decompensated Cirrhosis</li> </ul>                                                                                     | Umbilical cord derived MSCs                  | Collagen                                      |
| NCT02767817         | Active, not recruiting  | <ul style="list-style-type: none"> <li>• Brain Injury</li> </ul>                                                                                                | MSCs                                         | Collagen                                      |
| NCT03294759         | Active, not recruiting  | <ul style="list-style-type: none"> <li>• Anterior cruciate ligament rupture</li> </ul>                                                                          | Autologous bone marrow derived MSCs          | Collagen                                      |
| NCT02745808         | Unknown                 | <ul style="list-style-type: none"> <li>• Erectile Dysfunction</li> <li>• Type 1 Diabetes Mellitus</li> <li>• Type 2 Diabetes Mellitus</li> </ul>                | Umbilical cord derived MSCs                  | Collagen                                      |
| NCT02672280         | Unknown                 | <ul style="list-style-type: none"> <li>• Wounds</li> <li>• Diabetic Foot Ulcers</li> <li>• Burns</li> </ul>                                                     | Umbilical cord derived MSCs                  | Collagen                                      |
| NCT02644447         | Completed               | <ul style="list-style-type: none"> <li>• Premature Ovarian Failure</li> </ul>                                                                                   | Allogenic umbilical cord derived MSCs        | Collagen                                      |
| NCT02635464         | Completed               | <ul style="list-style-type: none"> <li>• Chronic Ischemic Cardiomyopathy</li> </ul>                                                                             | Allogenic umbilical cord derived MSCs        | Collagen                                      |
| NCT01687777         | Unknown                 | <ul style="list-style-type: none"> <li>• Rotator Cuff Tears</li> </ul>                                                                                          | Autologous MSCs                              | Collagen                                      |
| NCT03137979         | Unknown                 | <ul style="list-style-type: none"> <li>• Periodontitis</li> </ul>                                                                                               | Gingiva MSCs                                 | Collagen                                      |
| NCT03259217         | Unknown                 | <ul style="list-style-type: none"> <li>• Diabetic Foot Ulcer</li> </ul>                                                                                         | Adipose derived MSCs                         | Collagen-alginate with chitosan nanoparticles |
| NCT03766217         | Completed               | <ul style="list-style-type: none"> <li>• Cleft Lip and Palate</li> </ul>                                                                                        | Autologous deciduous dental pulp MSCs        | Collagen and hydroxyapatite                   |
| NCT03070275         | Completed               | <ul style="list-style-type: none"> <li>• Dental implant therapy</li> </ul>                                                                                      | Autologous alveolar bone marrow derived MSCs | Collagen and fibrin                           |
| NCT04236739         | Recruiting              | <ul style="list-style-type: none"> <li>• Cartilage damage</li> </ul>                                                                                            | Allogenic MSCs and autologous chondrocytes   | Fibrin                                        |
| NCT03865394         | Unknown                 | <ul style="list-style-type: none"> <li>• Diabetic foot ulcer</li> </ul>                                                                                         | Autologous adipose derived MSCs              | Fibrin                                        |
| NCT00891501         | Unknown                 | <ul style="list-style-type: none"> <li>• Degenerative Arthritis</li> <li>• Chondral Defects</li> <li>• Osteochondral Defects</li> </ul>                         | Autologous bone marrow derived MSCs          | Fibrin                                        |
| NCT04210440         | Completed               | <ul style="list-style-type: none"> <li>• Hip Necrosis</li> <li>• Hip Injuries</li> </ul>                                                                        | Autologous bone marrow derived MSCs          | Fibrin                                        |
| NCT01803347         | Completed               | <ul style="list-style-type: none"> <li>• Anal Fistula</li> </ul>                                                                                                | Autologous adipose derived MSCs              | Fibrin                                        |
| NCT01751282         | Terminated              | <ul style="list-style-type: none"> <li>• Non healing wounds</li> </ul>                                                                                          | Autologous bone marrow derived MSCs          | Fibrin                                        |

|             |                         |                                                                                                                                                                           |                                                                                                                             |                                         |
|-------------|-------------------------|---------------------------------------------------------------------------------------------------------------------------------------------------------------------------|-----------------------------------------------------------------------------------------------------------------------------|-----------------------------------------|
| NCT03113747 | Unknown                 | <ul style="list-style-type: none"> <li>• Second- or third- degree burns</li> </ul>                                                                                        | Allogenic adipose derived MSCs                                                                                              | Fibrin                                  |
| NCT02630836 | Withdrawn               | <ul style="list-style-type: none"> <li>• Femoral Neck Fracture</li> </ul>                                                                                                 | Allogenic bone marrow derived MSCs                                                                                          | Fibrin                                  |
| NCT02384499 | Completed               | <ul style="list-style-type: none"> <li>• Fecal Incontinence</li> </ul>                                                                                                    | Allogenic adipose derived MSCs                                                                                              | Fibrin                                  |
| NCT03449082 | Active, not recruiting  | <ul style="list-style-type: none"> <li>• Lateral Epicondylitis</li> </ul>                                                                                                 | Allogenic adipose derived MSCs                                                                                              | Fibrin                                  |
| NCT02298023 | Unknown                 | <ul style="list-style-type: none"> <li>• Rotator Cuff Tear</li> </ul>                                                                                                     | Allogenic adipose derived MSCs                                                                                              | Fibrin                                  |
| NCT03766139 | Unknown                 | <ul style="list-style-type: none"> <li>• Intrabony Periodontal Defect</li> </ul>                                                                                          | Peripheral Blood MSCs                                                                                                       | Fibrin                                  |
| NCT03044119 | Unknown                 | Dental implants                                                                                                                                                           | Peripheral blood MSCs                                                                                                       | Fibrin                                  |
| NCT01532076 | Terminated              | <ul style="list-style-type: none"> <li>• Osteoporotic Fractures</li> </ul>                                                                                                | Adipose derived MSCs                                                                                                        | Fibrin and hydroxyapatite microgranules |
| NCT03103295 | Unknown                 | <ul style="list-style-type: none"> <li>• Bone defects</li> </ul>                                                                                                          | Autologous bone marrow derived MSCs, periosteal progenitor cells, and peripheral blood-derived endothelial progenitor cells | Fibrin with demineralized bone matrix   |
| NCT03102879 | Completed               | <ul style="list-style-type: none"> <li>• Periapical Periodontitis</li> </ul>                                                                                              | Umbilical cord derived MSCs                                                                                                 | Plasma-derived biomaterial              |
| NCT04297813 | Recruiting              | <ul style="list-style-type: none"> <li>• Alveolar bone atrophy</li> </ul>                                                                                                 | Autologous MSCs                                                                                                             | Biphasic calcium phosphate              |
| NCT01842477 | Completed               | <ul style="list-style-type: none"> <li>• Delayed Union After Fracture of Humerus, Tibial or Femur</li> </ul>                                                              | Autologous bone marrow derived MSCs                                                                                         | biphasic calcium phosphate              |
| NCT02751125 | Completed               | <ul style="list-style-type: none"> <li>• Bone atrophy</li> </ul>                                                                                                          | Autologous bone marrow derived MSCs                                                                                         | Biphasic calcium phosphate              |
| NCT03325504 | Recruiting              | <ul style="list-style-type: none"> <li>• Non union fracture</li> </ul>                                                                                                    | Autologous bone marrow derived MSCs                                                                                         | Biphasic calcium phosphate              |
| NCT03638154 | Completed               | <ul style="list-style-type: none"> <li>• Periodontal intrabony defect</li> </ul>                                                                                          | Gingival MSCs and gingival fibroblasts                                                                                      | Beta tri calcium phosphate              |
| NCT01742260 | Unknown                 | <ul style="list-style-type: none"> <li>• Surgically-created Resection Cavity</li> </ul>                                                                                   | Allogenic MSCs                                                                                                              | Beta tri calcium phosphate and PLGA     |
| NCT03798353 | Recruiting              | <ul style="list-style-type: none"> <li>• Myocardial Infarction</li> </ul>                                                                                                 | Allogenic umbilical cord Wharton's jelly-derived adult MSCs                                                                 | Decellularized human pericardial matrix |
| NCT02949414 | Suspended               | <ul style="list-style-type: none"> <li>• Tracheomalacia</li> <li>• Tracheal Stenosis</li> </ul>                                                                           | Autologous bone marrow derived MSCs                                                                                         | Decellularized human tracheal scaffold  |
| NCT02352077 | Enrolling by invitation | <ul style="list-style-type: none"> <li>• Spinal Cord Injury</li> </ul>                                                                                                    | MSC                                                                                                                         | Decellularized bovine aponeurosis       |
| NCT04435249 | Not yet recruiting      | <ul style="list-style-type: none"> <li>• Bronchopleural Fistula</li> </ul>                                                                                                | Autologous bone marrow derived MSCs                                                                                         | Decellularized airway scaffold          |
| NCT02230514 | Completed               | <ul style="list-style-type: none"> <li>• Atrophic Nonunion of Fracture</li> </ul>                                                                                         | Autologous MSCs                                                                                                             | Decellularized bone tissue              |
| NCT02034786 | Unknown                 | <ul style="list-style-type: none"> <li>• Lipodystrophies</li> <li>• Aesthetics Procedure</li> </ul>                                                                       | Autologous adipose derived MSCs                                                                                             | Hyaluronic acid                         |
| NCT01981330 | Completed               | <ul style="list-style-type: none"> <li>• Improved Healing of Scarred Vocal Folds</li> <li>• Improved Vocal Fold Status</li> <li>• Improved Vocal Fold Function</li> </ul> | Autologous MSCs                                                                                                             | hyaluronan gel                          |
| NCT03066245 | Recruiting              | <ul style="list-style-type: none"> <li>• Aneurysmal Bone Cyst</li> </ul>                                                                                                  | Bone marrow derived MSCs                                                                                                    | PLGA                                    |
| NCT01298830 | Terminated              | <ul style="list-style-type: none"> <li>• Intracerebral Hemorrhage (ICH)</li> </ul>                                                                                        | Allogenic MSCs                                                                                                              | Alginate                                |

**Table S1.** Non-exhaustive list of clinical trials that combine MSCs with biomaterials from *ClinicalTrials.gov*. Current as of May 13, 2021.

| <b>Hydrogel</b>                      | <b>Storage Modulus (G')</b> | <b>Loss Modulus (G'')</b> |
|--------------------------------------|-----------------------------|---------------------------|
| 24 mg/mL fibrinogen (fibrin gel)     | 282.7 ± 3.4 Pa              | 48.7 ± 0.9 Pa             |
| 12 mg/mL fibrinogen (fibrin gel)     | 119.2 ± 1.2 Pa              | 18.5 ± 0.9 Pa             |
| 6 mg/mL fibrinogen (fibrin gel)      | 49.0 ± 1.0 Pa               | 8.5 ± 1.1 Pa              |
| 3 mg/mL fibrinogen gel (fibrin gel)  | 46.4 ± 1.0 Pa               | 6.7 ± 1.0 Pa              |
| 6 mg/mL collagen I (collagen gel)    | 274.1 ± 1.0 Pa              | 41.0 ± 1.1 Pa             |
| 3 mg/mL collagen I (collagen gel)    | 89.0 ± 1.3 Pa               | 14.8 ± 1.0 Pa             |
| 1.5 mg/mL collagen I (collagen gel)  | 28.7 ± 0.9 Pa               | 6.8 ± 0.8 Pa              |
| 0.75 mg/mL collagen I (collagen gel) | 26.2 ± 1.1 Pa               | 4.7 ± 1.1 Pa              |

**Table S2.** List of all tested hydrogels and their measured storage and loss modulus.

| <b>hMSC Donor ID</b> | <b>Sex</b> | <b>Age</b> | <b>Vendor</b> |
|----------------------|------------|------------|---------------|
| RB9                  | M          | 43         | RoosterBio    |
| RB12                 | M          | 33         | RoosterBio    |
| RB14                 | F          | 20         | RoosterBio    |
| RB16                 | F          | 26         | RoosterBio    |
| PCBM1632             | M          | 24         | All Cells     |
| PCBM1662             | F          | 31         | All Cells     |
| BM2893               | M          | 40         | All Cells     |
| BM3018               | M          | 41         | All Cells     |
| 110877               | M          | 22         | Lonza         |
| 127756               | M          | 43         | Lonza         |
| 1F3422               | M          | 39         | Lonza         |
| 8F3560               | F          | 24         | Lonza         |

**Table S3.** List of all tested MSC cell lines with respective donor and vendor information.

| <b>Figure</b> | <b>MSC passage number</b>                                                                                                           | <b>PBMC Donor</b>                                                                                           |
|---------------|-------------------------------------------------------------------------------------------------------------------------------------|-------------------------------------------------------------------------------------------------------------|
| Fig. 2        | RB9 p3, RB12 p3, RB14 p3, RB16 p3,<br>PCBM1632 p3, PCBM1662 p3, BM2893 p3, BM3018 p3,<br>110877 p3, 127756 p3, 1F3422 p3, 8F3560 p3 | Fig. 2A-D: Donor A<br>Fig. 2I-L: Donor G                                                                    |
| Fig. 3        | RB9 p3, RB12 p3, RB14 p3, RB16 p3                                                                                                   | Donor A                                                                                                     |
| Fig. 4        | RB9 p3, RB12 p3, RB14 p3, RB16 p3                                                                                                   | Donor B                                                                                                     |
| Fig. 5        | RB9 p3, RB12 p3, RB14 p3, RB16 p3                                                                                                   | Donor C and Donor D                                                                                         |
| Fig. 6        | Fig. 6A: RB9 p3, RB12 p3, RB14 p3, RB16 p3<br>Fig. 6B-F: RB9 p4, RB12 p4, RB14 p2, RB16 p2                                          | RB9 data- Donor D<br>RB12 data- Donor D and Donor E<br>RB14 data- Donor D and Donor E<br>RB16 data- Donor F |
| Fig. 7        | Fig. 7A: RB9 p3, RB12 p3, RB14 p3, RB16 p3<br>Fig. 7B-F: RB9 p4, RB12 p2, RB14 p2, RB16 p2                                          | RB9 data- Donor E<br>RB12 data- Donor F<br>RB14 data- Donor E<br>RB16 data- Donor F                         |
| Fig. S2       | RB9 p3, RB12 p3, RB14 p3, RB16 p3,<br>PCBM1632 p3, PCBM1662 p3, BM2893 p3, BM3018 p3,<br>110877 p3, 127756 p3, 1F3422 p3, 8F3560 p3 | Fig. 2A-D: Donor A<br>Fig. 2E-H: Donor G                                                                    |
| Fig. S3       | PCBM1632 p3, PCBM1662 p3, BM2893 p3, BM3018 p3,<br>110877 p3, 127756 p3, 1F3422 p3, 8F3560 p3                                       | Donor L                                                                                                     |
| Fig. S4       | RB12 p3, RB16 p3                                                                                                                    | Donor H                                                                                                     |
| Fig. S5       | RB12 p3, RB16 p3                                                                                                                    | Donor H                                                                                                     |
| Fig. S6       | RB9 p3, RB12 p3, RB14 p3, RB16 p3,<br>PCBM1632 p3, PCBM1662 p3, BM2893 p3, BM3018 p3,<br>110877 p3, 127756 p3, 1F3422 p3, 8F3560 p3 | Donor G                                                                                                     |
| Fig. S7       | RB9 p3, RB12 p3, RB14 p3, RB16 p3                                                                                                   | Donor A                                                                                                     |
| Fig. S8       | RB9 p3, RB12 p3, RB14 p3, RB16 p3                                                                                                   | Donor B                                                                                                     |
| Fig. S9       | RB9 p3, RB12 p3, RB14 p3, RB16 p3                                                                                                   | Donor C and Donor D                                                                                         |
| Fig. S10      | RB12 p3, RB16 p3                                                                                                                    |                                                                                                             |
| Fig. S11      | RB9 p3, RB12 p3, RB14 p3, RB16 p3                                                                                                   | Donor C and Donor D                                                                                         |
| Fig. S12      | RB9 p3, RB12 p3, RB14 p3, RB16 p3                                                                                                   | Donor C and Donor D                                                                                         |
| Fig. S13      | RB12 p3, RB16 p3                                                                                                                    |                                                                                                             |
| Fig. S14      | RB12 p3, RB16 p3                                                                                                                    | Donor H                                                                                                     |
| Fig. S15      | RB12 p3, RB16 p3                                                                                                                    |                                                                                                             |
| Fig. S16      | RB9 p3, RB12 p3, RB14 p3, RB16 p3,<br>PCBM1632 p3, PCBM1662 p3, BM2893 p3, BM3018 p3,<br>110877 p3, 127756 p3, 1F3422 p3, 8F3560 p3 |                                                                                                             |
| Fig. S17      | RB9 p3, RB12 p3, RB14 p3, RB16 p3,<br>PCBM1632 p3, PCBM1662 p3, BM2893 p3, BM3018 p3,<br>110877 p3, 127756 p3, 1F3422 p3, 8F3560 p3 | Donor G                                                                                                     |
| Fig. S18      | RB9 p4, RB12 p4, RB14 p2, RB16 p2                                                                                                   |                                                                                                             |
| Fig. S19      | RB9 p4, RB12 p4, RB14 p2, RB16 p2                                                                                                   | RB9 data- Donor D<br>RB12 data- Donor D and Donor E<br>RB14 data- Donor D and Donor E<br>RB16 data- Donor F |
| Fig. S20      | BM2893 p3, 1F3422 p5                                                                                                                | BM2893 Data- Donor J<br>1F3422 Data- Donor L                                                                |
| Fig. S21      | RB12 p3, RB16 p2                                                                                                                    | RB12 data- Donor H<br>RB16 data- Donor I                                                                    |

|          |                                   |                                                                                     |
|----------|-----------------------------------|-------------------------------------------------------------------------------------|
| Fig. S22 | RB9 p4, RB12 p2, RB14 p2, RB16 p2 |                                                                                     |
| Fig. S23 | RB9 p4, RB12 p2, RB14 p2, RB16 p2 | RB9 data- Donor E<br>RB12 data- Donor F<br>RB14 data- Donor E<br>RB16 data- Donor F |
| Fig. S24 | BM2893 p3, 1F3422 p3              | Donor K                                                                             |

**Table S4.** List of MSC cell lines, respective MSC passage numbers, and PBMC donors used for each figure.
